# Supplementary material
Source: Springer Nature journal article supplement (https://prod.mbexc.uni-goettingen.de/archive/1/733/7544a8ec8c8c9937/download)
Supplement: MOESM1 [file 41467_2026_72673_MOESM1_ESM.pdf › 41467_2026_72673_MOESM1_ESM.pdf]

## Supplementary Information

For

### **Diverse mechanisms of translation arrest by a Clostridia ribosome stalling peptide CliM**

Mayu Yoshida<sup>1,\*</sup>, Felix Gersteuer<sup>2,\*</sup>, Ole Berendes<sup>3</sup>, Keigo Fujiwara<sup>1,4</sup>, Haaris A. Safdari<sup>2</sup>, Helge Paternoga<sup>2</sup>, Hiraku Takada<sup>1,5</sup>, Nozomu Obana<sup>6,7</sup>, Helmut Grubmüller<sup>3</sup>, Lars Bock<sup>3</sup>, Daniel N. Wilson<sup>2,#</sup>, Shinobu Chiba<sup>1,#</sup>

<sup>1</sup> Faculty of Life Sciences and Institute for Protein Dynamics, Kyoto Sangyo University, Kamigamo, Motoyama, Kita-ku, Kyoto 603-8555, Japan.

<sup>2</sup> Institute for Biochemistry and Molecular Biology, Martin-Luther-King-Platz 6, University of Hamburg, 20146 Hamburg, Germany.

<sup>3</sup> Department of Theoretical and Computational Biophysics, Max Planck Institute for Multidisciplinary Sciences, Göttingen, Germany

<sup>4</sup> Department of Gene Function and Phenomics, National Institute of Genetics, Mishima, Japan

<sup>5</sup> Biotechnology Research Center and Department of Biotechnology, Toyama Prefectural University, 5180 Kurokawa, Imizu, Toyama 939-0398, Japan

<sup>6</sup> Transborder Medical Research Center, Institute of Medicine, University of Tsukuba, Tsukuba, Japan

<sup>7</sup> Microbiology Research Center for Sustainability (MiCS), University of Tsukuba, Tsukuba, Japan

\* These authors contributed equally

# Corresponding authors:

Prof Shinobu Chiba ([schiba@cc.kyoto-su.ac.jp](mailto:schiba@cc.kyoto-su.ac.jp))

Prof Daniel N. Wilson ([Daniel.wilson@uni-hamburg.de](mailto:Daniel.wilson@uni-hamburg.de))

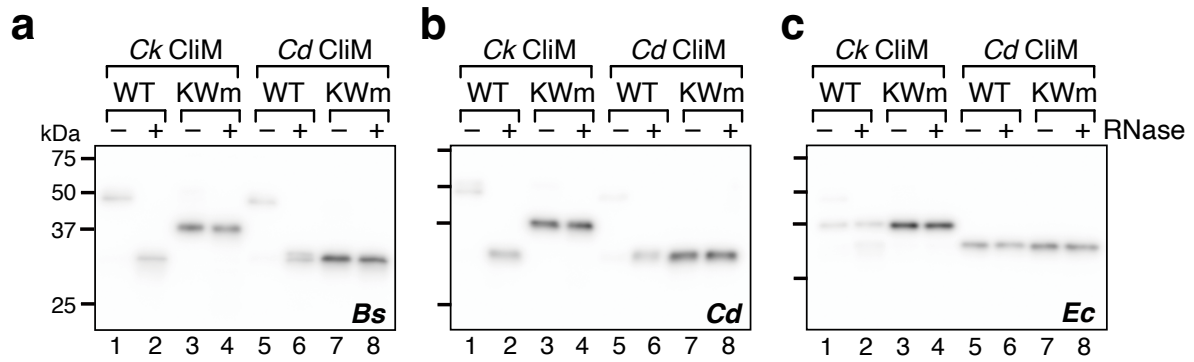

**Supplementary Fig. 1: Ck and Cd CliM arrest Bs and Cd ribosomes.** a-c Western blot analysis of the in vitro translation products of Ck and Cd CliM. WT or KWm mutant derivatives of the *gfp-cliM-myc-lacZ $\alpha$*  translational fusion reporters were translated in the Bs PURE (a), Cd PURE (b), or Ec PURE (c). The products were separated in neutral-pH gels and immunoblotted using anti-GFP antibody. Samples treated with RNase A (+) were analyzed alongside untreated samples (-) to distinguish peptidyl-tRNA from full-length hydrolyzed products. Molecular size markers (kDa) are shown on the left. Western blotting was independently repeated at least twice to ensure reproducibility. Source data are provided as a Source Data file.

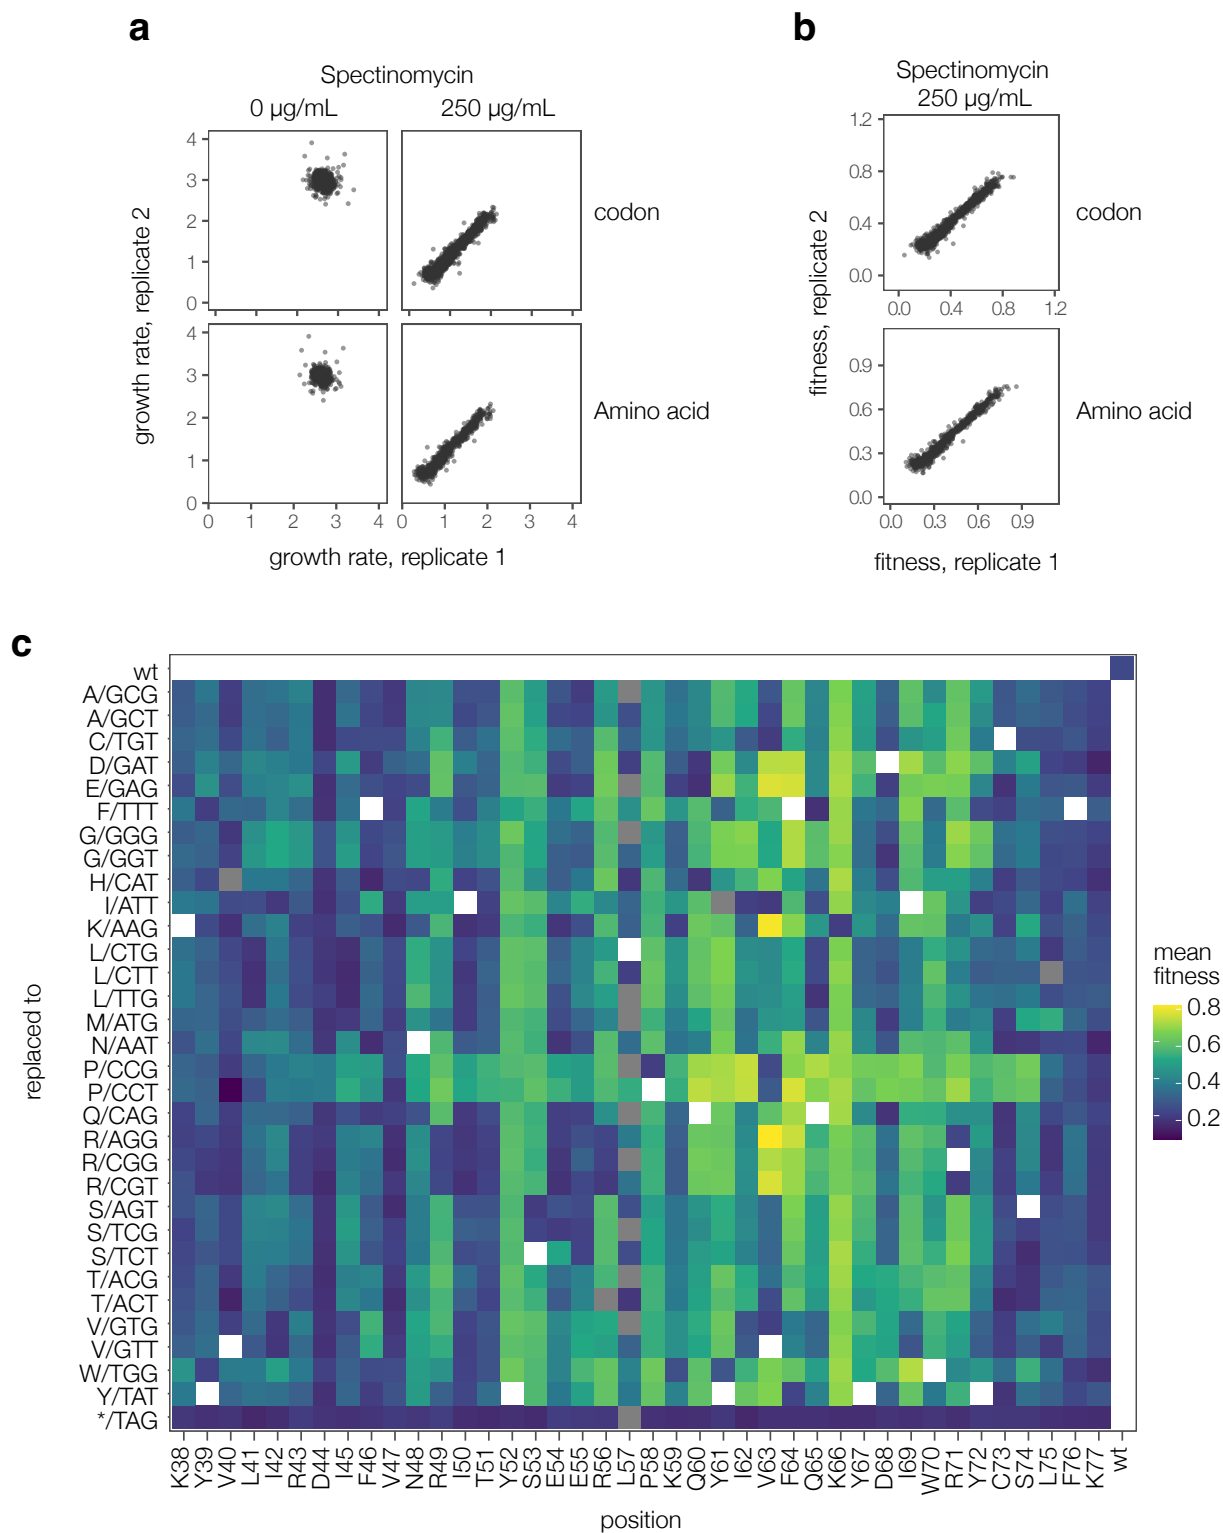

**Supplementary Fig. 2: Reproducibility of Deep mutational scanning.** (a-b) Scatter plots of growth rates (a) and fitness values (b) of each variant are shown at the codon level (upper) and at the amino acid level (lower), where amino acid-level values were obtained by averaging synonymous codon variants. In each plot, biological replicate 1 is shown on the x-axis and biological replicate 2 on the y-axis, demonstrating reproducibility across replicates. (c) The heatmap shows the relative fitness of each variant at the codon level, calculated as the mean of two biological replicates (related to Fig. 3), demonstrating that synonymous codon variants generally exhibit similar fitness values. Residue numbers and wild-type amino acids are indicated along the bottom, and substituted residues are shown along the left.

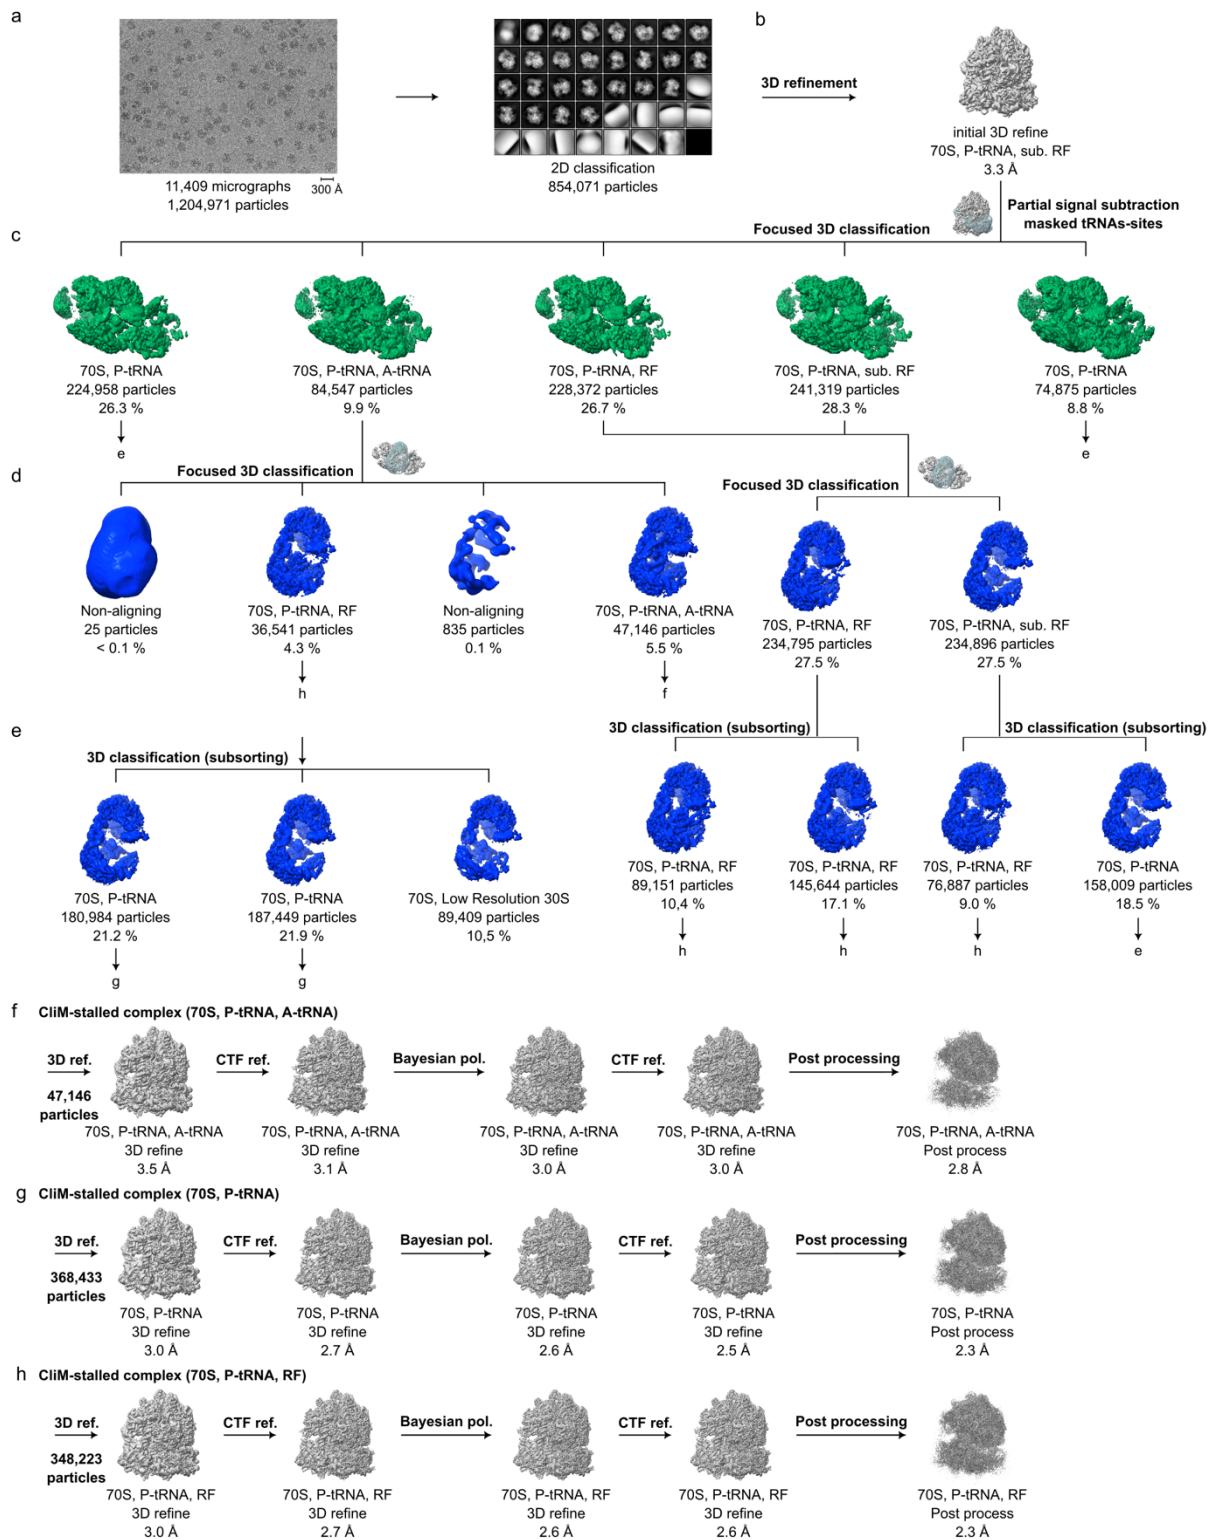

**Supplementary Fig. 3: *In silico* sorting scheme for CiIM.** (a) From 11,409 micrographs, 1,204,971 particles were picked and subjected to 2D classification resulting in 854,071 ribosome-like particles. Particles were (b) initially 3D-refined, then (c) subsorted into 5 classes using a mask around the tRNA binding sites. (d-e) The resulting classes with P-tRNA and vacant A-site, PtRNA and release factor as well as PtRNA and A-tRNA were further subsorted with a mask around the A-site until homogeneity was reached. The minor class with (f) both A- and P-tRNA density (5.5%) resulted in a final resolution (at FSC 0.143) of 2.8 Å. After combining of the respective particles, two major classes with (g) P-tRNA and vacant A-site (43.1%) as well as (h) P-tRNA and release factor (40.8%) resulted in a final resolution (at FSC 0.143) of 2.3 Å, respectively.

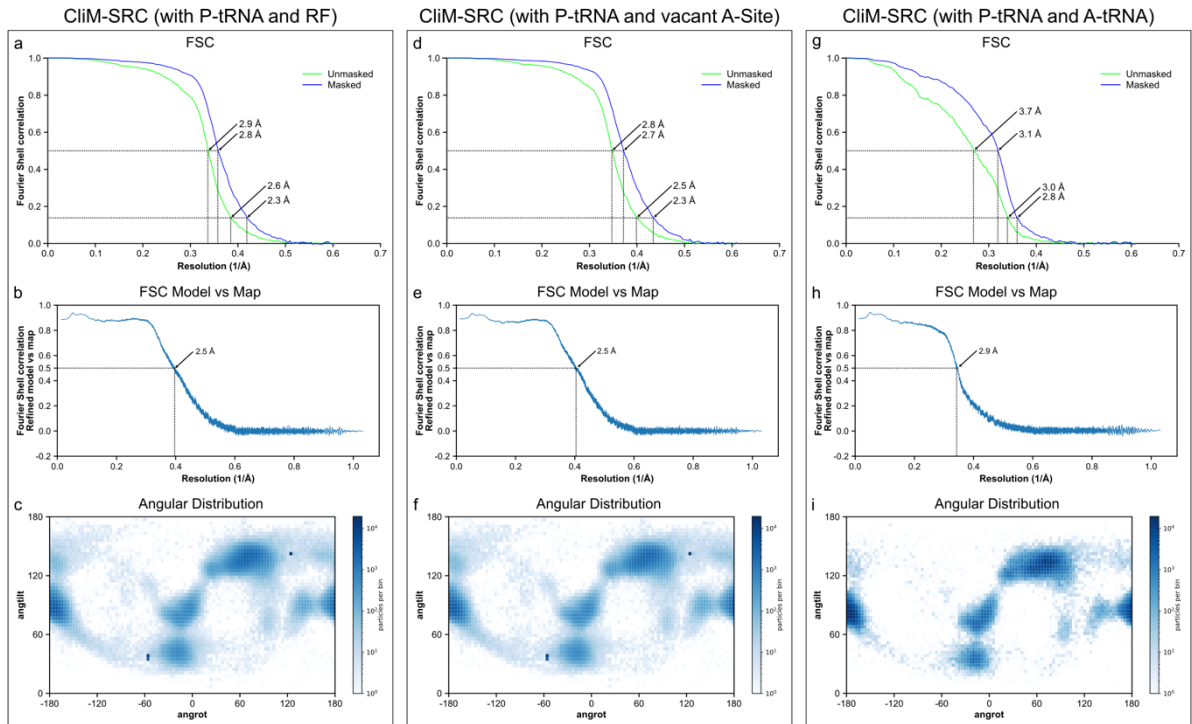

**Supplementary Fig. 4: Fourier Shell Correlation curves and angular distribution for CliM-SRC.** (a-c) Fourier shell correlation (FSC) curve of the (a) CliM-SRC containing P-tRNA and RF, (b) with P-tRNA and vacant A-site and (c) with P-tRNA and A-tRNA, with unmasked (green) and masked (blue) FSC curves plotted against the resolution ( $1/\text{\AA}$ ). (d-f) Refined model vs map FSC curve of the CliM-SRC from (a)-(c) plotted against the resolution ( $1/\text{\AA}$ ). (g-i) Angular distribution of particles used for 3D reconstruction from Relion for the CliM-SRC from (a)-(c). Particles are binned and logarithmical represented from white to blue.

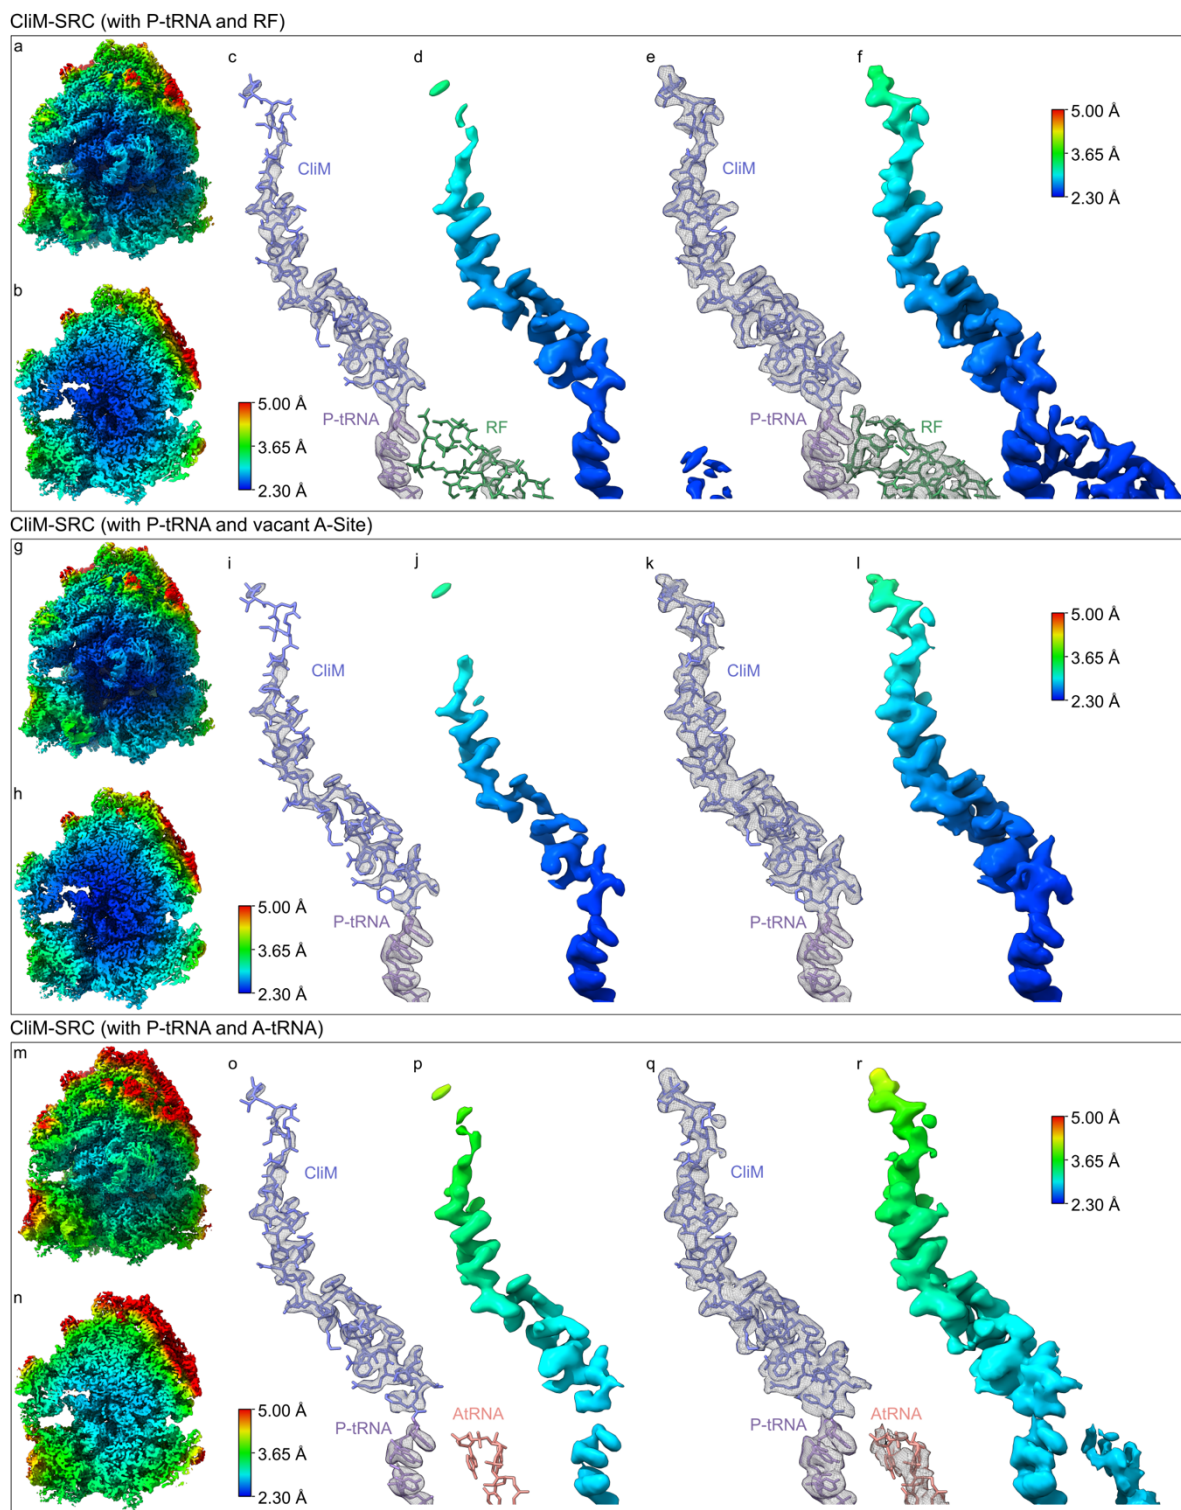

**Supplementary Fig. 5: Local resolution for the CliM-SRCs.** (a-r) Cryo-EM density for the 3D-refined map of the CliM-SRC with (a-f) P-tRNA and RF, (g-l) P-tRNA and vacant A-site, and (m-r) P-tRNA and A-tRNA, coloured according local resolution, or as transparent grey surface (c, e, i, k, o, q) with molecular model of the CliM-SRC taken from RF bound complex, and with A-tRNA (orange) in (o,q). In (a,g,m), overviews of the cryo-EM maps of the CliM-SRC are shown, whereas in (b,h,n), a transverse section reveals the core of the 50S subunit, including the ribosomal exit tunnel. In (e-f, k-l, q-r) the same representation is shown as in (c-d, i-j, o-p) but at a lower threshold.

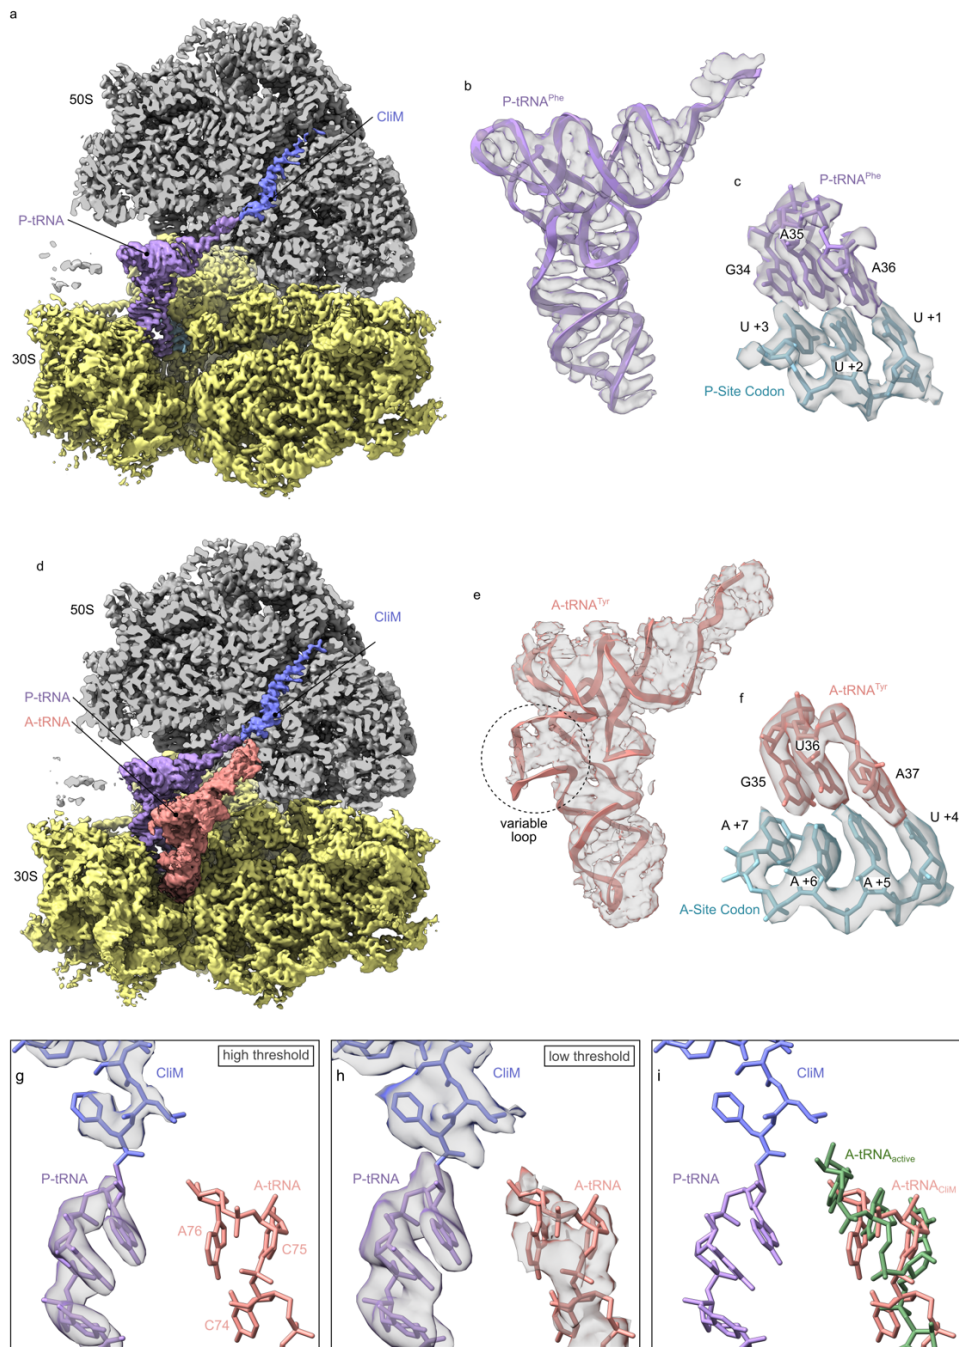

**Supplementary Fig. 6: Cryo-EM density for the P-tRNA and A-tRNA.** (a) Cryo-EM density for the 3D-refined map of the CliM-SRC (30S, yellow; 50S grey) with P-tRNA (purple) and vacant A-site, and transverse section of the 50S showing CliM nascent chain (blue) within the exit tunnel. (b-c) cryo-EM map density (transparent grey) for (b) the P-tRNA from (a) with fitted model for tRNA<sup>Phe</sup> (purple), and (c) anticodon of tRNA<sup>Phe</sup> in the P-site base-pairing with the UUU codon (positions +1 to +3) of the mRNA (green). (d) Cryo-EM density for the 3D-refined map of the CliM-SRC (30S, yellow; 50S grey) with P-tRNA (purple) and A-tRNA, and transverse section of the 50S showing CliM nascent chain (blue) within the exit tunnel. (e-f) cryo-EM map density (transparent grey) for (e) the A-tRNA from (d) with fitted model for tRNA<sup>Tyr</sup> (brown), and (f) anticodon of tRNA<sup>Tyr</sup> in the P-site base-pairing with the UAA stop codon (positions +4 to +6) of the mRNA (green). (g-i) View of the PTC of the (g-h) A-tRNA (rose) containing state of CliM (blue) that shows a flexible CCA-end of the A-tRNA by missing density at (g) high threshold, and (h) low threshold with noisy density, and no proper accommodation shown by the comparison with a (i) CCA-end of an properly accommodated tRNA (green) (PDB ID 8CVK)<sup>1</sup>, in the A-site of the PTC.

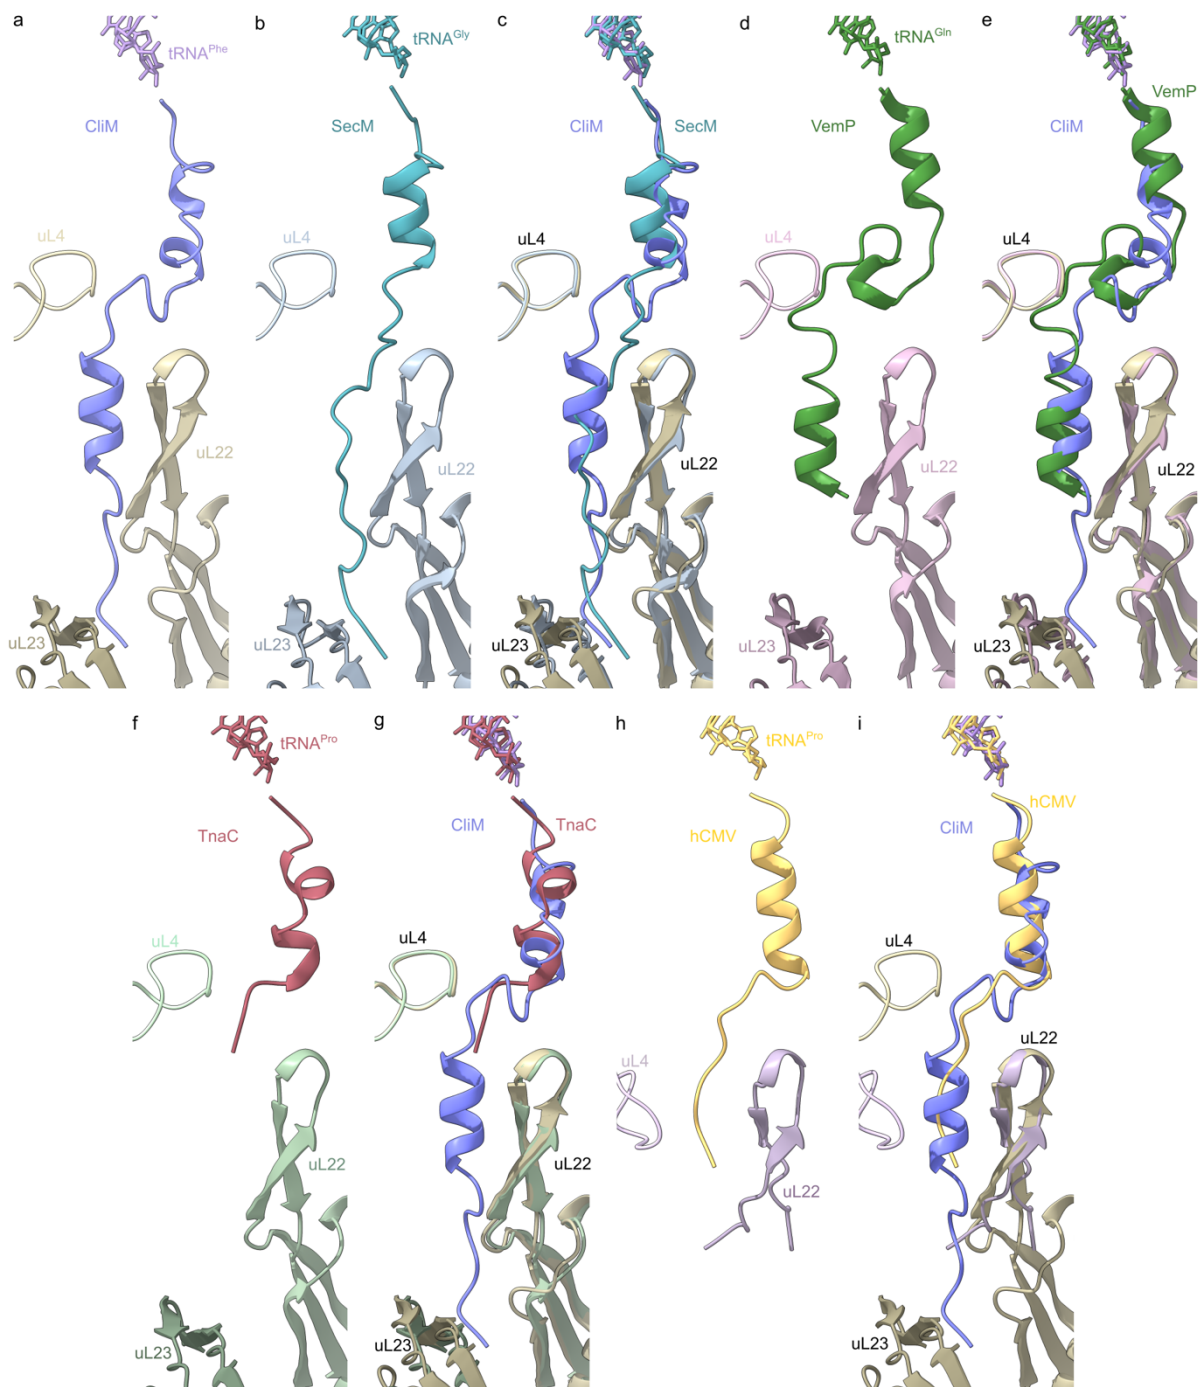

**Supplementary Fig. 7: Comparison of CliM with SecM, VemP and TnaC arrest peptides.** (a) CliM (blue) attached to the P-tRNA (lavender) in relation to uL4 (light gold), uL22 (gold) and uL23 (dark gold). (b) SecM (PDB ID 8QOA)<sup>2</sup> attached to the P-tRNA (teal) in relation to uL4 (light slate blue), uL22 (slate blue) and uL23 (dark slate blue). (c) Overlay (aligned on the basis of 23S rRNA) of (a) CliM and (b) SecM. (d) VemP (PDB ID 5NWX)<sup>3</sup> attached to the P-tRNA (green) in relation to uL4 (light rose), uL22 (rose) and uL23 (dark rose). (e) Overlay (aligned on the basis of 23S rRNA) (a) CliM and (d) VemP. (f) TnaC (PDB ID 7O19)<sup>4</sup> attached to the P-tRNA (red) in relation to uL4 (light mint), uL22 (mint) and uL23 (dark mint). (g) Overlay (aligned on the basis of 23S rRNA) of (a) CliM and (f) TnaC. (h) hCMV (PDB ID 5A8I)<sup>5</sup> attached to the P-tRNA (gold) in relation to uL4 (pink) and uL22 (purple). (i) Overlay (aligned on the basis of 23S rRNA) of (a) CliM and (h) hCMV.

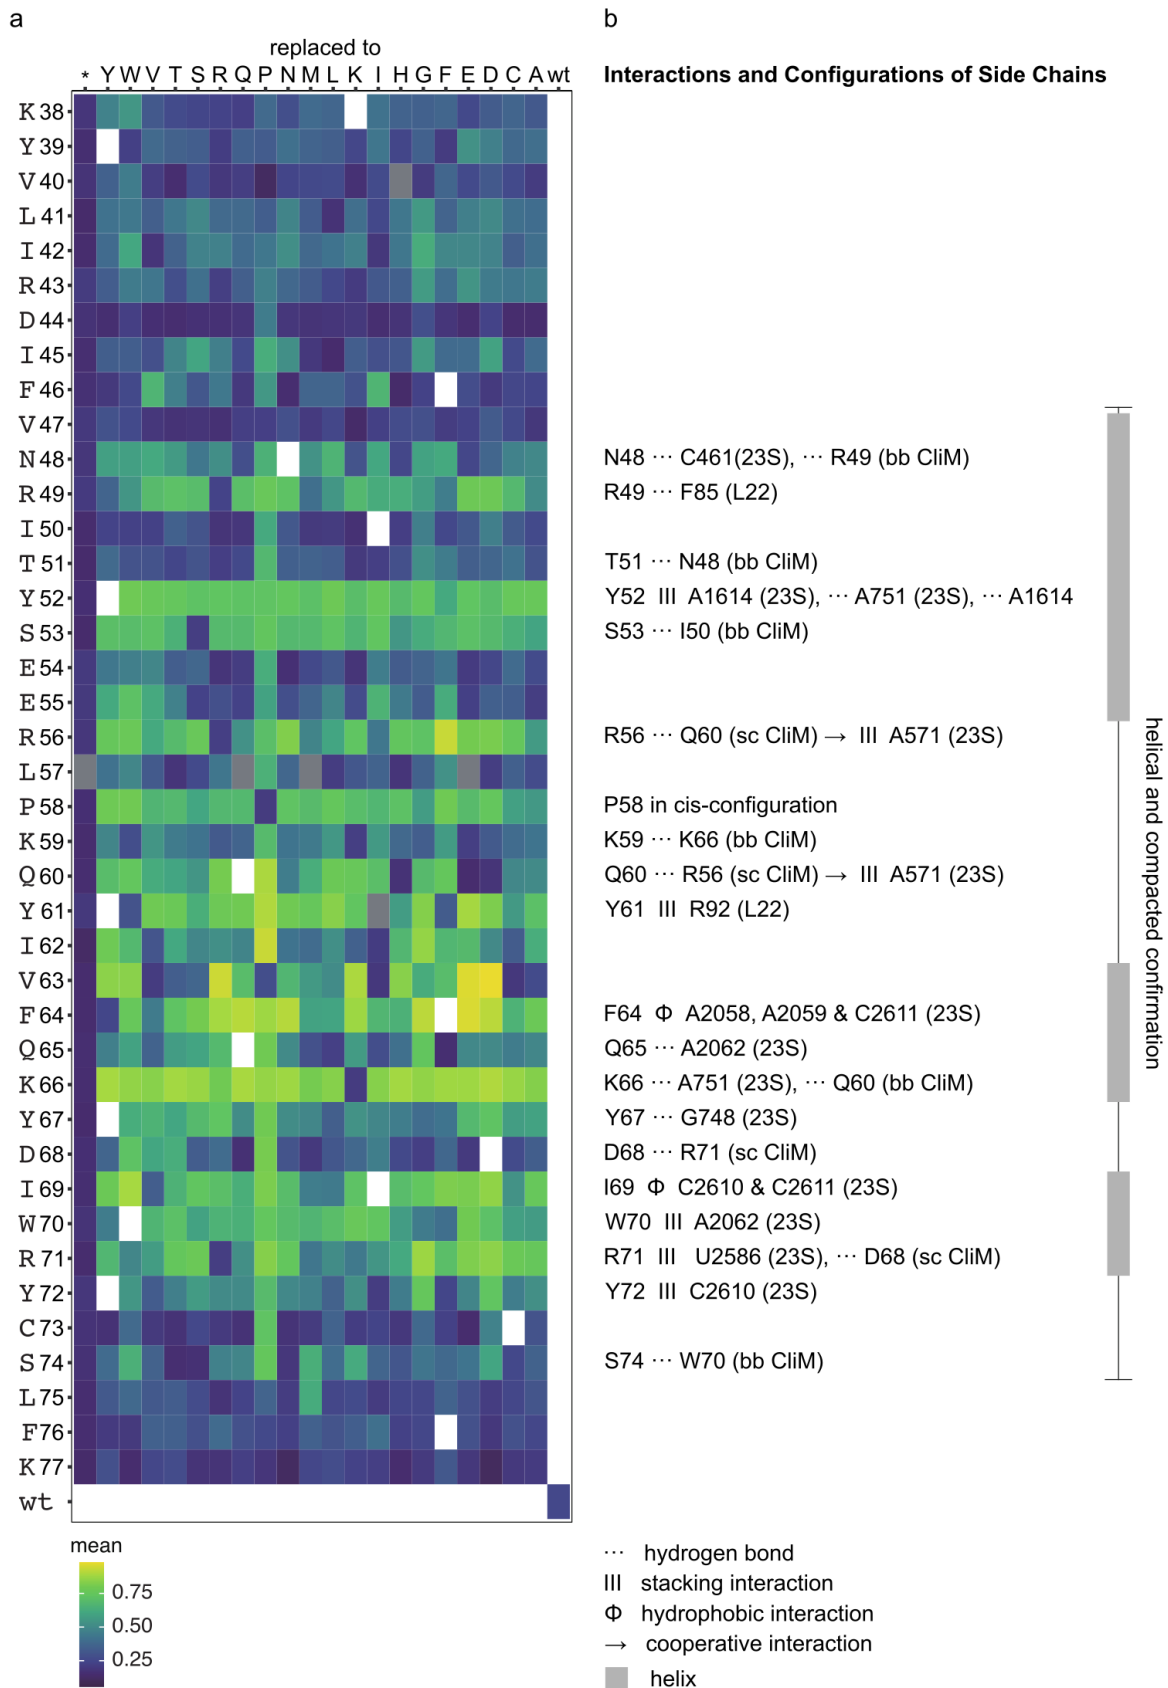

**Supplementary Fig. 8: Correlation between DMS-seq and cryo-EM data for CliM.** **a**, Heatmap from Fig 3c of relative fitness (mean of two biological replicate) of each CliM mutant compared with **b**, interactions of CliM sidechain observed in the cryo-EM structure of CliM-SRC. CliM secondary structure is also indicated.

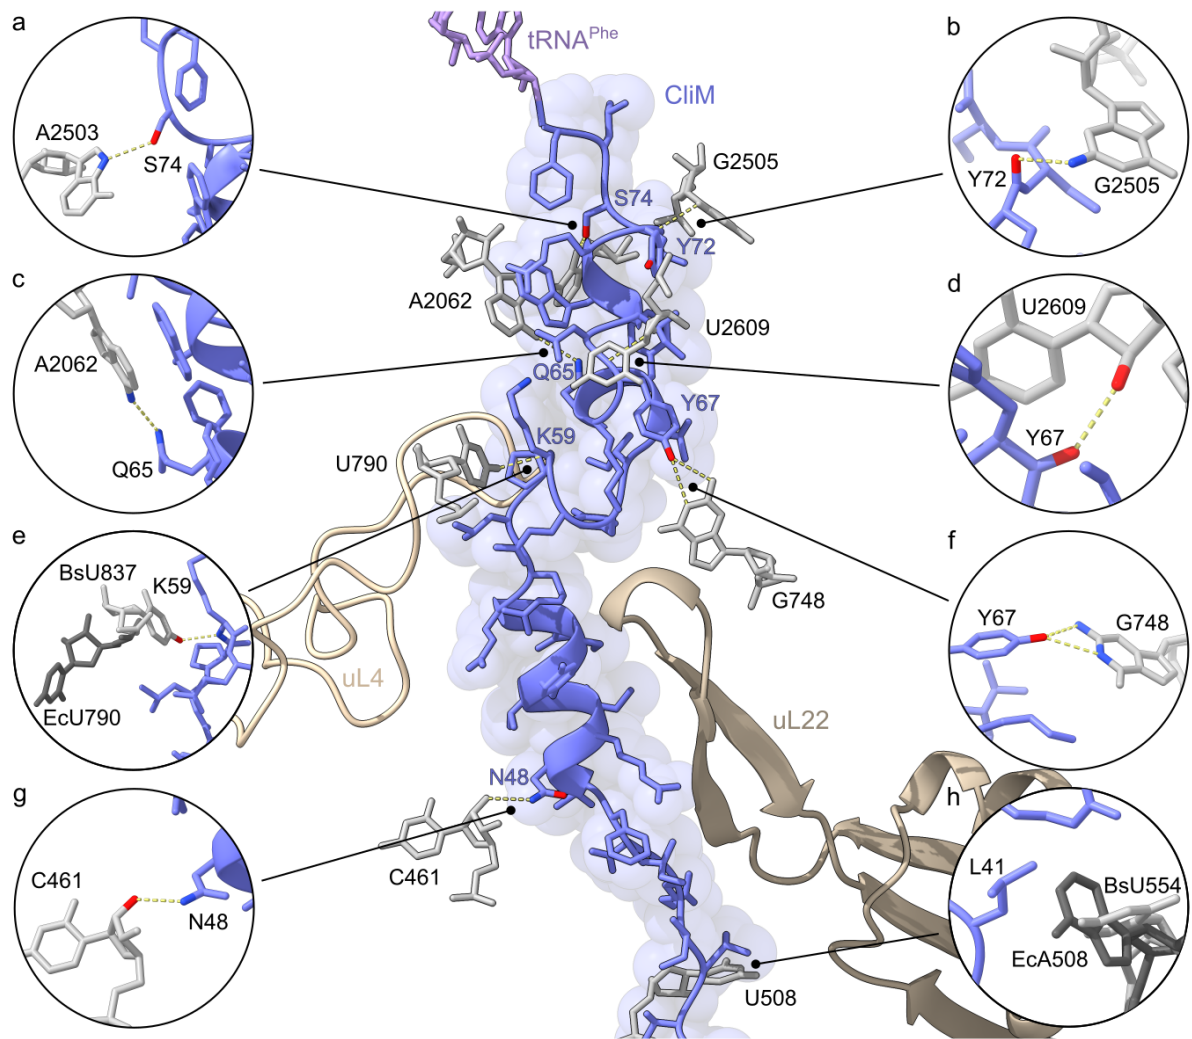

**Supplementary Fig. 9: Interaction of CliM with nucleotides of the 23S rRNA.** (a-h) The central panel shows the CliM nascent chain (blue) attached to the P-site tRNA (lavender) and ribosomal proteins uL4 (light gold) and uL22 (gold), with selected contacts with the 23S rRNA (grey) highlighted by individual panels. Dashed yellow lines indicated potential hydrogen bond interactions.

**a**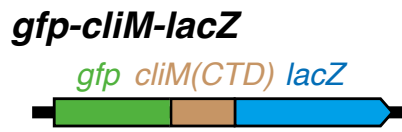**b uL22**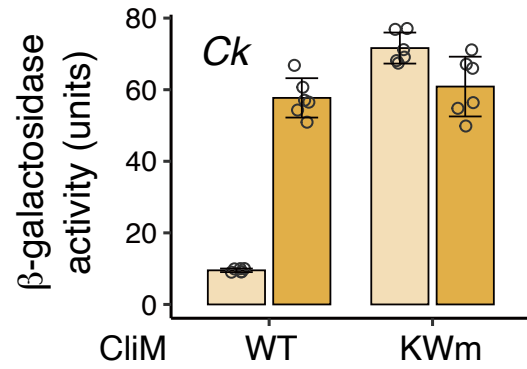**c uL4**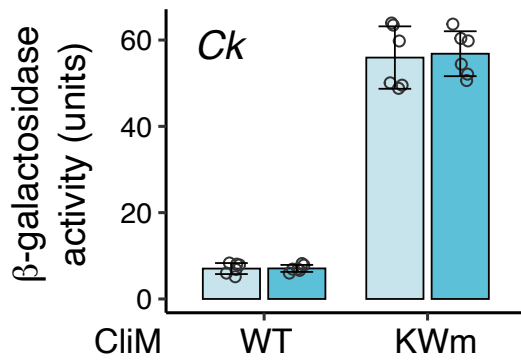**d uL23**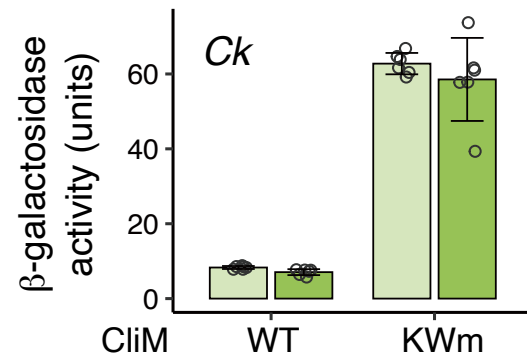

**Supplementary Fig. 10: Mutation in uL22 abolishes arrest by Ck CliM.** **a** Schematic representation of *gfp-cliM-lacZ* reporter. A gene fragment encoding the C-terminal domain (CTD) of Ck CliM was fused in-frame with *gfp* and *lacZ*. **b-d**  $\beta$ -galactosidase activity (mean  $\pm$  s.d., n=6, biologically independent cultures) of *B. subtilis* cells carrying WT or KWm derivatives of the *gfp-cliM-lacZ* reporter with (dark bars) or without (light bars) loop deletions in uL22 (b), uL4 (c), or uL23 (d). Source data are provided as a Source Data file.

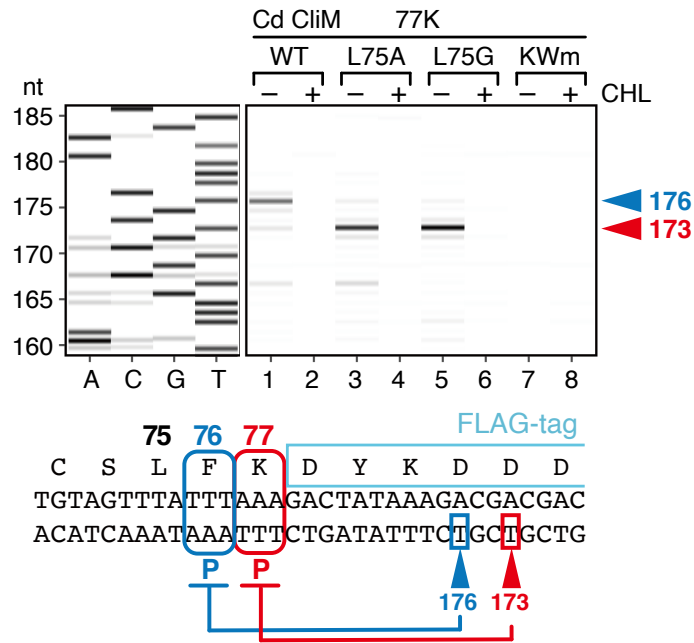

**Supplementary Fig. 11: Flexible stalling site selection determined by local sequence context.** Toeprinting analysis of WT and Leu75 mutant derivatives of Cd CliM with substitution of the stop codon by Lys (77K). The reverse translation products were analyzed by capillary sequencer and signals were represented as a gel-style heatmap. In vitro translation was performed in the presence or absence of chloramphenicol (CHL). The toeprint length (nt) were calibrated against dideoxy sequencing (left). The estimated stalling sites (P-site codon) based on the toeprint length are shown with their codon numbers (bottom). Toeprinting analysis was independently repeated at least twice to ensure reproducibility. Source data are provided as a Source Data file.

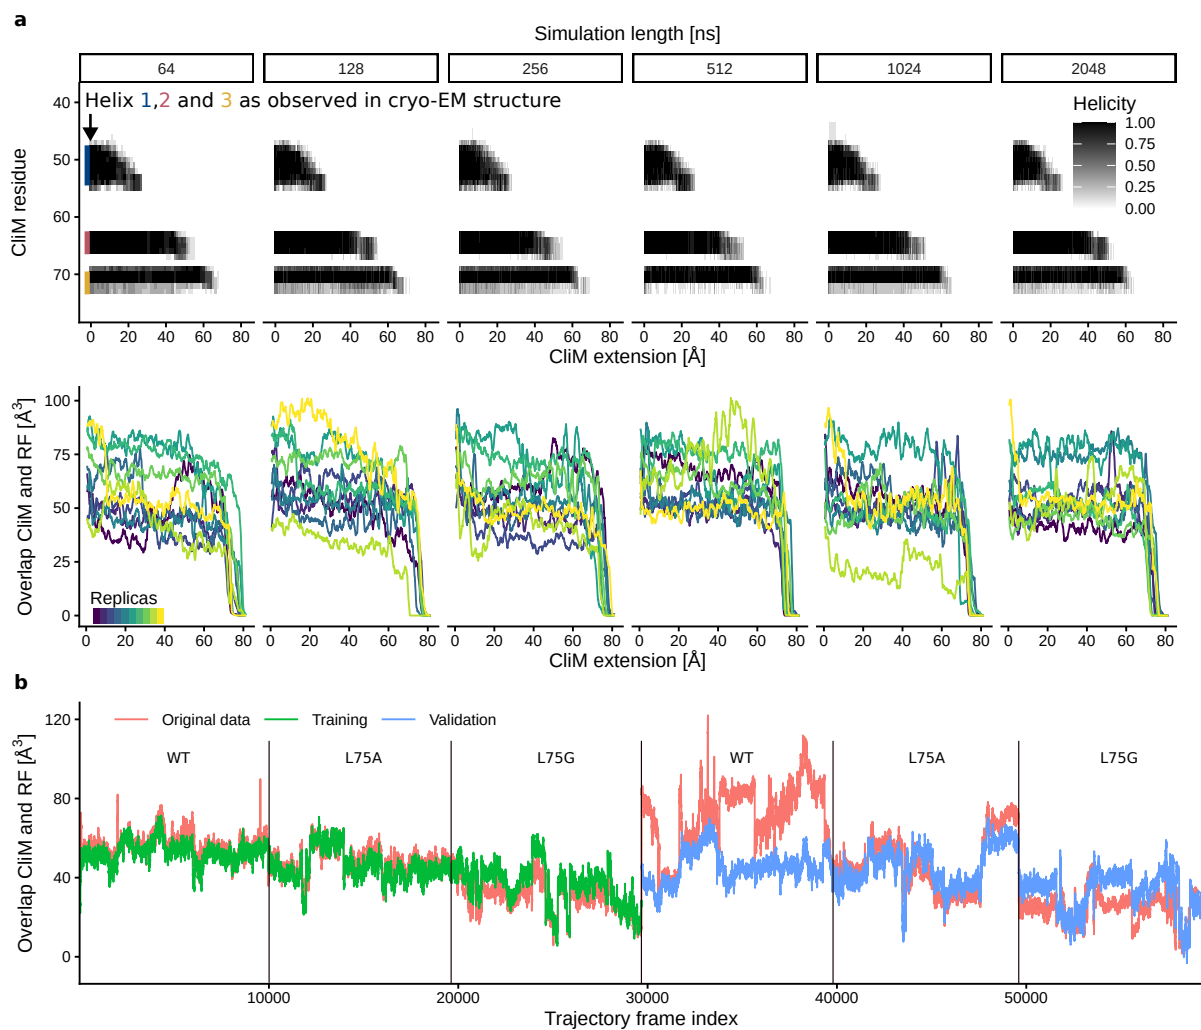

**Supplementary Fig. 12: CliM dynamics during constant-velocity pulling MD simulations and cross-validation of functional mode analysis (FMA).** (a) Top panel: For different pulling simulation lengths, the time evolution of the helicity per residue is shown. Helicity is defined as the average of secondary structure states (1: Residue part of helix, 0: Residue not part of helix) over 10 independent simulation replicas. Colored bars in the leftmost panel show the secondary structure of the cryo-EM model. Bottom panel: Time evolution of the overlap volume between CliM and aligned RF for each simulation replica. (b) Comparison of measured overlap volume for frames of all unbiased MD simulation trajectories (WT and L75A, L75G mutants, red line) with overlap volume predicted from FMA (green for training, blue for validation).

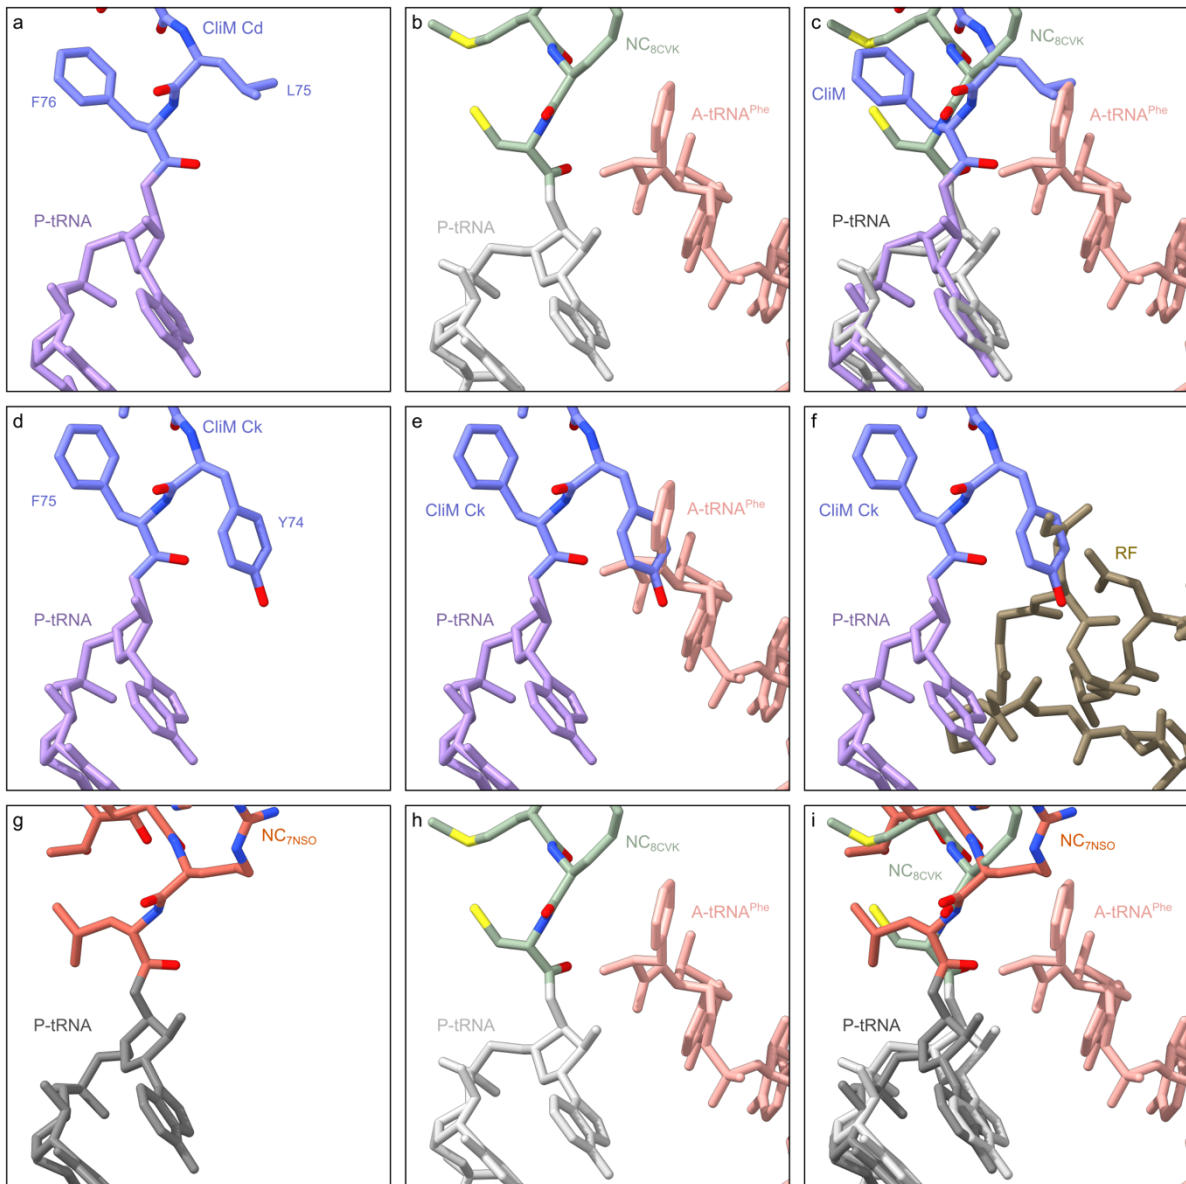

**Supplementary Fig. 13: Comparison of CliM with accommodated A-tRNA.** (a) View of the PTC of the A-tRNA containing state of CliM (blue) attached to the P-tRNA (purple). (b) View of the PTC of a pre-attack state (PDB ID 8CVK)<sup>1</sup>, showing a tripeptidyl-NH-tRNA (green/light grey) at the P-site and a phenyl-NH-tRNA (rose) at the A-site. (c) Overlay of (a) and (b) (aligned on the basis of 23S rRNA) highlighting the incompatibility of CliM's penultimate residue Leu75 position and an accommodated aminoacyl-tRNA moiety in the A-site of the PTC. (d) In silico created CliM Ck (blue) mutated from CliM Cd attached to the P-tRNA (purple). (e-f) Overlay of (d) CliM Ck with (e) phenyl-NH-tRNA (rose) (PDB ID 8CVK)<sup>1</sup> and (f) release factor 1 (brown) (PDB ID 9MTP)<sup>6</sup> in the A-site, highlighting the incompatibility of proper accommodation into the A-site of the PTC for both with Tyr in the penultimate position of the CliM nascent peptide. (g) View of the PTC of stalled ErmDL peptide (red)(PDB ID 7NSO)<sup>7</sup> attached to the P-tRNA (dark grey). (h) Same panel as in (b). (i) Overlay of (g) and (h) (aligned of the basis of 23S rRNA) highlighting the similarity of ErmDL- and CliM-induced stalling by encroaching penultimate nascent peptide residues into the A-site that are incompatible with proper accommodation of an aminoacyl-tRNA moiety in the A-site of the PTC.

## Supplementary Table 1: Strain list

| strain  | plasmid  | host    | genotype                                                                                                            |
|---------|----------|---------|---------------------------------------------------------------------------------------------------------------------|
| SCB4668 | pCH2713  | SCB3065 | spoIIJ $\Omega$ kan, amyE::Ck_CliM-lacZ $\Omega$ cat                                                                |
| SCB4669 | pCH2714  | SCB3065 | spoIIJ $\Omega$ kan, amyE::Ck_CliM(dTM)-lacZ $\Omega$ cat                                                           |
| SCB4670 | pCH2715  | SCB3065 | spoIIJ $\Omega$ kan, amyE::Ck_CliM(K65A/W69A)-lacZ $\Omega$ cat                                                     |
| SCB4671 | pCH2716  | SCB3065 | spoIIJ $\Omega$ kan, amyE::Ck_CliM(dTM/K65A/W69A)-lacZ $\Omega$ cat                                                 |
| SCB4676 | pCH2713  | SCB2969 | AspoIIIJ::tet, amyE::Ck_CliM-lacZ $\Omega$ cat                                                                      |
| SCB4677 | pCH2714  | SCB2969 | AspoIIIJ::tet, amyE::Ck_CliM(dTM)-lacZ $\Omega$ cat                                                                 |
| SCB4678 | pCH2715  | SCB2969 | AspoIIIJ::tet, amyE::Ck_CliM(K65A/W69A)-lacZ $\Omega$ cat                                                           |
| SCB4679 | pCH2716  | SCB2969 | AspoIIIJ::tet, amyE::Ck_CliM(dTM/K65A/W69A)-lacZ $\Omega$ cat                                                       |
| SCB4696 | pCH2736  | SCB3065 | spoIIJ $\Omega$ kan, amyE::Ck_CliM-Dstem2-yidC2(1-6)-lacZ $\Omega$ cat                                              |
| SCB4697 | pCH2737  | SCB3065 | spoIIJ $\Omega$ kan, amyE::Ck_CliM(dTM)-Dstem2-yidC2(1-6)-lacZ $\Omega$ cat                                         |
| SCB4698 | pCH2738  | SCB3065 | spoIIJ $\Omega$ kan, amyE::Ck_CliM(K65A/W69A)-Dstem2-yidC2(1-6)-lacZ $\Omega$ cat                                   |
| SCB4699 | pCH2739  | SCB3065 | spoIIJ $\Omega$ kan, amyE::Ck_CliM(dTM/K65A/W69A)-Dstem2-yidC2(1-6)-lacZ $\Omega$ cat                               |
| SCB4700 | pCH2736  | SCB2969 | AspoIIIJ::tet, amyE::Ck_CliM-Dstem2-yidC2(1-6)-lacZ $\Omega$ cat                                                    |
| SCB4701 | pCH2737  | SCB2969 | AspoIIIJ::tet, amyE::Ck_CliM(dTM)-Dstem2-yidC2(1-6)-lacZ $\Omega$ cat                                               |
| SCB4702 | pCH2738  | SCB2969 | AspoIIIJ::tet, amyE::Ck_CliM(K65A/W69A)-Dstem2-yidC2(1-6)-lacZ $\Omega$ cat                                         |
| SCB4703 | pCH2739  | SCB2969 | AspoIIIJ::tet, amyE::Ck_CliM(dTM/K65A/W69A)-Dstem2-yidC2(1-6)-lacZ $\Omega$ cat                                     |
| YSB117  | pKIG1225 | SCB2634 | rplW(d65-69) $\Omega$ kan, amyE::PmifM-gfp-Ck_cliM-lacZ $\Omega$ cat                                                |
| YSB118  | pYS37    | SCB2634 | rplW(d65-69) $\Omega$ kan, amyE::PmifM-gfp-Ck_cliM(K65A W69A)-lacZ $\Omega$ cat                                     |
| YSB119  | pCH2675  | SCB2613 | rplW $\Omega$ kanWrplB, amyE::PmifM gfp-Cd_cliM(30-76)-R71CGG_L75TTA_77K-flag-lacZ $\Omega$ cat                     |
| YSB120  | pCH2691  | SCB2613 | rplW $\Omega$ kanWrplB, amyE::PmifM gfp-Cd_cliM(30-76)-(K66A/W70A)-R71CGG_L75TTA_77K-flag-lacZ $\Omega$ cat         |
| YSB121  | pCH2675  | SCB2942 | rplD(d66-70) $\Omega$ kan, amyE::PmifM gfp-Cd_cliM(30-76)-R71CGG_L75TTA_77K-flag-lacZ $\Omega$ cat                  |
| YSB122  | pCH2691  | SCB2942 | rplD(d66-70) $\Omega$ kan, amyE::PmifM gfp-Cd_cliM(30-76)-(K66A/W70A)-R71CGG_L75TTA_77K-flag-lacZ $\Omega$ cat      |
| YSB123  | pCH2675  | SCB2634 | rplW(d65-69) $\Omega$ kan, amyE::PmifM gfp-Cd_cliM(30-76)-R71CGG_L75TTA_77K-flag-lacZ $\Omega$ cat                  |
| YSB124  | pCH2691  | SCB2634 | rplW(d65-69) $\Omega$ kan, amyE::PmifM gfp-Cd_cliM(30-76)-(K66A/W70A)-R71CGG_L75TTA_77K-flag-lacZ $\Omega$ cat      |
| YSB125  | pCH2675  | SCB2656 | rpsS $\Omega$ kan, amyE::PmifM gfp-Cd_cliM(30-76)-R71CGG_L75TTA_77K-flag-lacZ $\Omega$ cat                          |
| YSB126  | pCH2691  | SCB2656 | rpsS $\Omega$ kan, amyE::PmifM gfp-Cd_cliM(30-76)-(K66A/W70A)-R71CGG_L75TTA_77K-flag-lacZ $\Omega$ cat              |
| YSB127  | pCH2675  | SCB2917 | rpsS $\Omega$ kanWrplV(d86-90), amyE::PmifM gfp-Cd_cliM(30-76)-R71CGG_L75TTA_77K-flag-lacZ $\Omega$ cat             |
| YSB128  | pCH2691  | SCB2917 | rpsS $\Omega$ kanWrplV(d86-90), amyE::PmifM gfp-Cd_cliM(30-76)-(K66A/W70A)-R71CGG_L75TTA_77K-flag-lacZ $\Omega$ cat |
| YSB129  | pCH2675  | PY79    | amyE::PmifM gfp-Cd_cliM(30-76)-R71CGG_L75TTA_77K-flag-lacZ $\Omega$ cat                                             |
| YSB130  | pCH2691  | PY79    | amyE::PmifM gfp-Cd_cliM(30-76)-(K66A/W70A)-R71CGG_L75TTA_77K-flag-lacZ $\Omega$ cat                                 |
| YSB41   | pKIG1225 | PY79    | amyE::PmifM-gfp-Ck_cliM-lacZ $\Omega$ cat                                                                           |
| YSB45   | pYS37    | PY79    | amyE::PmifM-gfp-Ck_cliM(K65A W69A)-lacZ $\Omega$ cat                                                                |
| YSB65   | pYS47    | SCB3065 | spoIIJ $\Omega$ kan, amyE::PmifM-Ck_cliM-Ck_YidC2(1-6aa)-lacZ $\Omega$ cat                                          |
| YSB66   | pYS50    | SCB3065 | spoIIJ $\Omega$ kan, amyE::PmifM-Ck_cliM(dTM)-Ck_YidC2(1-6aa)-lacZ $\Omega$ cat                                     |
| YSB67   | pYS49    | SCB3065 | spoIIJ $\Omega$ kan, amyE::PmifM-Ck_cliM(K65A W69A)-Ck_YidC2(1-6aa)-lacZ $\Omega$ cat                               |
| YSB68   | pYS51    | SCB3065 | spoIIJ $\Omega$ kan, amyE::PmifM-Ck_cliM(dTM K65A K69A)-Ck_YidC2(1-6aa)-lacZ $\Omega$ cat                           |
| YSB69   | pYS47    | SCB2969 | AspoIIIJ::tet, amyE::PmifM-Ck_cliM-Ck_YidC2(1-6aa)-lacZ $\Omega$ cat                                                |
| YSB70   | pYS50    | SCB2969 | AspoIIIJ::tet, amyE::PmifM-Ck_cliM(dTM)-Ck_YidC2(1-6aa)-lacZ $\Omega$ cat                                           |
| YSB71   | pYS49    | SCB2969 | AspoIIIJ::tet, amyE::PmifM-Ck_cliM(K65A W69A)-Ck_YidC2(1-6aa)-lacZ $\Omega$ cat                                     |
| YSB72   | pYS51    | SCB2969 | AspoIIIJ::tet, amyE::PmifM-Ck_cliM(dTM K65A K69A)-Ck_YidC2(1-6aa)-lacZ $\Omega$ cat                                 |
| YSB81   | pKIG1225 | SCB2613 | rplW $\Omega$ kanWrplB, amyE::PmifM-gfp-Ck_cliM-lacZ $\Omega$ cat                                                   |
| YSB82   | pYS37    | SCB2613 | rplW $\Omega$ kanWrplB, amyE::PmifM-gfp-Ck_cliM(K65A W69A)-lacZ $\Omega$ cat                                        |
| YSB83   | pKIG1225 | SCB2942 | rplD(d66-70) $\Omega$ kan, amyE::PmifM-gfp-Ck_cliM-lacZ $\Omega$ cat                                                |
| YSB84   | pYS37    | SCB2942 | rplD(d66-70) $\Omega$ kan, amyE::PmifM-gfp-Ck_cliM(K65A W69A)-lacZ $\Omega$ cat                                     |
| YSB85   | pKIG1225 | SCB2656 | rpsS $\Omega$ kan, amyE::PmifM-gfp-Ck_cliM-lacZ $\Omega$ cat                                                        |
| YSB86   | pYS37    | SCB2656 | rpsS $\Omega$ kan, amyE::PmifM-gfp-Ck_cliM(K65A W69A)-lacZ $\Omega$ cat                                             |
| YSB87   | pKIG1225 | SCB2917 | rpsS $\Omega$ kanWrplV(d86-90), amyE::PmifM-gfp-Ck_cliM-lacZ $\Omega$ cat                                           |
| YSB88   | pYS37    | SCB2917 | rpsS $\Omega$ kanWrplV(d86-90), amyE::PmifM-gfp-Ck_cliM(K65A W69A)-lacZ $\Omega$ cat                                |

Supplementary Table 2. Plasmid construction

| plasmid   | primer fw1                   | primer rv1               | template 1                                       | primer fw2               | primer rv2                 | template 2 | primer fw3   | primer rv3   | template 3 | ref           |
|-----------|------------------------------|--------------------------|--------------------------------------------------|--------------------------|----------------------------|------------|--------------|--------------|------------|---------------|
| pCH2126   |                              |                          |                                                  |                          |                            |            |              |              |            | Sakiyama 2021 |
| pCH2527   | amyE-front-1w                | pDG 1662-DspcR-fw        | psK69                                            | pDG 1662-DspcR-rv        | FLAG_2-7-rv                | psK69      | FLAG-SpcR-fw | amyE-SpcR-rv | psK69      |               |
| pCH2612   | flag-fw                      | gfp238-rv                | pCH2627                                          | gfp238-fw                | Cdf1_KYX1W-K-flag-rv       | pKIG1283   |              |              |            |               |
| pCH2674   | CIM-R71CGG-L75TTA-FLAG-1w    |                          | pCH2612                                          |                          |                            |            |              |              |            |               |
| pCH2675   | flag-fw                      | gfp238-rv                | pCH2126                                          | gfp238-fw                | flag_2-7-rv                | pCH2674    |              |              |            |               |
| pCH2691   | Cd_CIM-repro-KWm-fw          | Cd_CIM-KWm-rv            | pCH2675                                          |                          |                            |            |              |              |            |               |
| pCH2713   | CIM-LacZ nontGA fw           | Ck non TGA LacZ rv       | pYS48                                            |                          |                            |            |              |              |            |               |
| pCH2714   | CIM-LacZ nontGA fw           | Ck non TGA LacZ rv       | pYS49                                            |                          |                            |            |              |              |            |               |
| pCH2715   | CIM-LacZ nontGA fw           | Ck non TGA LacZ rv       | pYS50                                            |                          |                            |            |              |              |            |               |
| pCH2716   | CIM-LacZ nontGA fw           | Ck non TGA LacZ rv       | pYS51                                            |                          |                            |            |              |              |            |               |
| pCH2730   | Cd_CIM-RE-77STP-FL-fw        | Cd_CIM_RE-S74-rv         | pCH2675                                          |                          |                            |            |              |              |            |               |
| pCH2731   | Cd_CIM-RE-L75A-77STP-FL-fw   | Cd_CIM_RE-S74-rv         | pCH2675                                          |                          |                            |            |              |              |            |               |
| pCH2732   | Cd_CIM-RE-L75G-77STP-FL-fw   | Cd_CIM_RE-S74-rv         | pCH2675                                          |                          |                            |            |              |              |            |               |
| pCH2736   | Ck_CIM-Dstem2-fw             | Ck_CIM-Dstem2-rv         | pCH2717                                          |                          |                            |            |              |              |            |               |
| pCH2737   | Ck_CIM-Dstem2-fw             | Ck_CIM-Dstem2-rv         | pCH2718                                          |                          |                            |            |              |              |            |               |
| pCH2738   | Ck_CIM-Dstem2-fw             | Ck_CIM-Dstem2-rv         | pCH2719                                          |                          |                            |            |              |              |            |               |
| pCH2739   | Ck_CIM-Dstem2-fw             | Ck_CIM-Dstem2-rv         | pCH2720                                          |                          |                            |            |              |              |            |               |
| pCH2764   | Cd_CIM-RE-76stp-FL-fw        | Cd_CIM-C73-rv            | pCH2730                                          |                          |                            |            |              |              |            |               |
| pCH2765   | Cd_CIM-S74L-76stp-FL-fw      | Cd_CIM-C73-rv            | pCH2730                                          |                          |                            |            |              |              |            |               |
| pCH2767   | Cd_CIM-S74G-76stp-FL-fw      | Cd_CIM-C73-rv            | pCH2730                                          |                          |                            |            |              |              |            |               |
| pCH2768   | Cd_CIM-S74V-76stp-FL-fw      | Cd_CIM-C73-rv            | pCH2730                                          |                          |                            |            |              |              |            |               |
| pCH2774   | Cd_CIM-RE-L75DKK-77STP-FL-fw | Cd_CIM_RE-S74-rv         | pCH2730                                          |                          |                            |            |              |              |            |               |
| pCH2779   | Cd_CIM-RE-L75S-77STP-FL-fw   | Cd_CIM_RE-S74-rv         | pCH2730                                          |                          |                            |            |              |              |            |               |
| pCH2780   | Cd_CIM-RE-L75I-77STP-FL-fw   | Cd_CIM_RE-S74-rv         | pCH2730                                          |                          |                            |            |              |              |            |               |
| pCH2781   | Cd_CIM-RE-L75V-77STP-FL-fw   | Cd_CIM_RE-S74-rv         | pCH2730                                          |                          |                            |            |              |              |            |               |
| pKIG 1225 |                              |                          |                                                  |                          |                            |            |              |              |            |               |
| pKIG 1283 | Cd_AP_wt fw                  | Cd_AP_wt rv              | chrDNA of C. difficile 630                       | myc-lacZ-fw              | gfp238-rv                  | psK69      |              |              |            | Fujiwara 2024 |
| pKIG 1284 | Cd_AP_wt fw                  | Cd_AP_stp77A rv          | chrDNA of C. difficile 630                       | myc-lacZ-rv              | gfp238-rv                  | psK69      |              |              |            |               |
| pKIG 1285 | Cd_AP_wt fw                  | Cd_AP_stp77K rv          | chrDNA of C. difficile 630                       | myc-lacZ-fw              | gfp238-rv                  | psK69      |              |              |            |               |
| pKIG 1288 | amp121-128(TM62)             | Cdf AP Q65 rv            | pKIG 1283                                        | Cdf AP K66A W70A fw      | amp121-128(TM62) antisense | pKIG1283   |              |              |            |               |
| psK69     |                              |                          |                                                  |                          |                            |            |              |              |            |               |
| pYS37     | amp121-128(TM62)             | uYrdC-Ob_klu-E64 rv      | pKIG 1225                                        | uYrdC_Ob_klu_K65A-W69A   | amp121-128(TM62) antisense | pKIG1225   |              |              |            |               |
| pYS38     | amp121-128(TM62)             | Cd_AP_F76stp rv          | pKIG 1283                                        | myc24 fw                 | amp121-128(TM62) antisense | pKIG1283   |              |              |            |               |
| pYS39     | amp121-128(TM62)             | Cd_AP_F75stp rv          | pKIG 1283                                        | myc24 fw                 | amp121-128(TM62) antisense | pKIG1283   |              |              |            |               |
| pYS40     | amp121-128(TM62)             | Ck_AP_F76stp rv          | pKIG 1225                                        | myc24 fw                 | amp121-128(TM62) antisense | pKIG1225   |              |              |            |               |
| pYS41     | amp121-128(TM62)             | Ck_AP_F75stp rv          | pKIG 1225                                        | myc24 fw                 | amp121-128(TM62) antisense | pKIG1225   |              |              |            |               |
| pYS42     | amp121-128(TM62)             | Ck_AP_F74stp rv          | pKIG 1225                                        | myc24 fw                 | amp121-128(TM62) antisense | pKIG1225   |              |              |            |               |
| pYS47     | C-kluyv-pCH746-fw            | C-kluyv-pCH746 rv        | uYrdC-Obst_kluyv (GeneArt Strings DNA Fragments) | lacZ_lba4-fw             | PrinfM-16nt 27rv           | pCH746     |              |              |            |               |
| pYS49     | amp121-128(TM62)             | uYrdC-Ob_klu-E64 rv      | pYS47                                            | uYrdC_Ob_klu_K65A-W69A   | amp121-128(TM62) antisense | pYS47      |              |              |            |               |
| pYS50     | amp121-128(TM62)             | C. kluyv dele_TM12-21 rv | pYS47                                            | C. kluyv dele_TM12-21 fw | amp121-128(TM62) antisense | pYS47      |              |              |            |               |
| pYS51     | amp121-128(TM62)             | uYrdC-Ob_klu-E64 rv      | pYS49                                            | uYrdC_Ob_klu_K65A-W69A   | amp121-128(TM62) antisense | pYS49      |              |              |            |               |

### Supplementary Table 3: Primer list

| Primer name                   | Sequence (5'-3')                                                           |
|-------------------------------|----------------------------------------------------------------------------|
| amp121-128(TM62)              | GCAGTGTGCCATAACCATGAGTG                                                    |
| amp121-128(TM62) antisense    | CACTCATGGTTATGGCAGCACTGC                                                   |
| myc24 fw                      | GAACAAAACTCATCTCAGAAGAG                                                    |
| uYidC_Clo_klu_K65A-W69A       | CCTAAAGACTATTTGGTCTATGAAGCATATAGAATAGCATGGTATTTTGTATATTTTAAA               |
| uYidC-Clo_klu-E64 rv          | TTCATAGACCAATAGTCTTTAGGATA                                                 |
| Cd_AP_F76stp rv               | ATCCTCTTCTGAGATGAGTTTTTGTCTTACAAACTACAATACCTCCAATATC                       |
| Cd_AP_F75stp rv               | ATCCTCTTCTGAGATGAGTTTTTGTCTTAACTACAATACCTCCAATATCATA                       |
| Ck_AP_F76stp rv               | ATCCTCTTCTGAGATGAGTTTTTGTCTTAAAAATATACAAAAATACCACCATAT                     |
| Ck_AP_F75stp rv               | ATCCTCTTCTGAGATGAGTTTTTGTCTTAAATATACAAAAATACCACCATATTCT                    |
| Ck_AP_F74stp rv               | ATCCTCTTCTGAGATGAGTTTTTGTCTTATACAAAAATACCACCATATTCTATA                     |
| lacZ lle4-fw                  | ATTACGGATTCACCTGGCCGT                                                      |
| PmifM-16nt 27rv               | GCTTCATTTTACTATATGTACAAGCTG                                                |
| C-kluyv-pCH746-fw             | TACATATAGTAAATGAAGCTATTGAATGGATGTGATGAAAAATAGATACTCTATTAATAA               |
| C-kluyv-pCH746 rv             | ACGGCCAGTGAATCCGTAATCATGGTATTTAAAAATATGTTTCATATAAATCCTCTCCTTA              |
| C_kluyv dele_TM12-21 fw       | ATGAAAAATAGATACTCTATTAATAATGCAAATCTGCTTTATGTTAGCACCATC                     |
| C_kluyv dele_TM12-21 rv       | AATTTGCACTATTAAATAGAGTATCTATTTTCAT                                         |
| PT7-RBSkf-GFP                 | TAACTTTAAAGAAGGAGGGAGATATACCAATGACAATGTTTGTGGGATC                          |
| lacZ60-TAATAA-21-rv           | TGGTGCCGGAACACAGGCAAATATTAGCGCCATTCGCCATTCAGGCT                            |
| Universal primer-77-PURE      | GAAATTAATACGACTCACTATAGGGAGACCACAACGCGTTCCCTCTAGAAAAATTTTGTAACTTTAAGAAGGAG |
| amyE-front-fw                 | TAGAGATCCGATCAGACCAGT                                                      |
| flag-fw                       | GACTATAAAGACGACGACGAC                                                      |
| CliM-R71CGG-L75TTA-FLAG-fw    | ATTTGGCGGTATTGTAGTTTATTTAAAGACTATAAAGAC                                    |
| Cd_CliM-repro-KWm-fw          | TTTCAGGCATATGATATTGCGCGGTATTGTAGTTTATTT                                    |
| CliM-LacZ nonTGA fw           | ATTTTAAAAAAGAACCATTGATTACGGATTCAGT                                         |
| Cd_CliM-RE-77STP-FL-fw        | GATATTTGGCGGTATTGTAGTTTATTTAAAGACTATAAAGACGAC                              |
| Cd_CliM-RE-L75A-77STP-FL-fw   | GATATTTGGCGGTATTGTAGTGCATTTTAAAGACTATAAAGACGAC                             |
| Cd_CliM-RE-L75G-77STP-FL-fw   | GATATTTGGCGGTATTGTAGTGGATTTTAAAGACTATAAAGACGAC                             |
| Ck_CliM-Dstem2-fw             | GTATTTTGTATATTTTAAATTCGTTGAACAAGTAAATTTAGGAA                               |
| Cd_CliM-RE-76stp-FL-fw        | GATATTTGGCGGTATTGTAGTTTATAATAAGACTATAAAGACGAC                              |
| Cd_CliM-S74L-76stp-FL-fw      | GATATTTGGCGGTATTGTCTTTTATAATAAGACTATAAAGACGAC                              |
| Cd_CliM-S74G-76stp-FL-fw      | GATATTTGGCGGTATTGTGGTTTATAATAAGACTATAAAGACGAC                              |
| Cd_CliM-S74V-76stp-FL-fw      | GATATTTGGCGGTATTGTGTTTATAATAAGACTATAAAGACGAC                               |
| Cd_CliM-RE-L75DKK-77STP-FL-fw | GATATTTGGCGGTATTGTAGTDKKTTTTAAAGACTATAAAGACGAC                             |
| Cd_CliM-RE-L75S-77STP-FL-fw   | GATATTTGGCGGTATTGTAGTTCATTTTAAAGACTATAAAGACGAC                             |
| Cd_CliM-RE-L75I-77STP-FL-fw   | GATATTTGGCGGTATTGTAGTATATTTTAAAGACTATAAAGACGAC                             |
| Cd_CliM-RE-L75V-77STP-FL-fw   | GATATTTGGCGGTATTGTAGTGTATTTTAAAGACTATAAAGACGAC                             |
| pDG1662-DspcR-fw              | AATCAACGAGGTGAAATCGCTAATTTTATTGCAATAACA                                    |
| gfp238-rv                     | TTTGTATAGTTCATCCATGCC                                                      |
| CliM-R71CGG-rv                | ACTACAATACCGCCAAATATCATATTTCTGAAAAACTATATACTG                              |
| Cd_CliM-KWm-rv                | CGCAATATCATATGCCGAAAAACTATATACTGTTAGG                                      |
| Ck non TGA LacZ rv            | CCGTAATCATGGTCTTATTTTAAAAATATACAAAAATACCA                                  |
| Cd_CliM_RE-S74-rv             | ACTACAATACCGCCAAATATCATATTT                                                |
| Ck_CliM-Dstem2-rv             | ATTTTAAAAATATACAAAAATACCA                                                  |
| Cd_CliM-C73-rv                | ACAATACCGCCAAATATCATATTTCTG                                                |
| pDG1662-DspcR-rv              | TATTGCAATAAAATAGCGATTTTCACCTCGTTGATTATG                                    |
| gfp238-fw                     | GGCATGGATGAACTATACAAA                                                      |
| FLAG_2-7-rv                   | TTTGTCTGCTCGTCTTTATA                                                       |
| Cdif_KYxIW-K-flag-rv          | GTCGTCGCTTTATAGTCTTTTAAACAAACTACAATACCTCCAAT                               |
| FLAG-SpcR-fw                  | TATAAAGACGACGACGACAAAAGCAATTTAATTAACGGAAAA                                 |
| amyE-SpcR-rv                  | ACTGGTCTGATCGGATCTCTACTAATTTAGAGAAAGTTTCTAT                                |
| Cd_AP_wt fw                   | GGCATGGATGAACTATACAAAAAAGACCTCTTAAATCATAAAAATTAAGTATGTT                    |
| Cd_AP_wt rv                   | ATCCTCTTCTGAGATGAGTTTTTGTCTTAAACAAACTACAATACCTCCAATATC                     |
| Cd_AP_stp77A rv               | ATCCTCTTCTGAGATGAGTTTTTGTCTGCAACAAACTACAATACCTCCAAT                        |
| Cd_AP_stp77K rv               | ATCCTCTTCTGAGATGAGTTTTTGTCTTAAACAAACTACAATACCTCCAATATC                     |
| Cdif AP Q65 rv                | CTGAAAAACTATATACTGTTTAGGCAG                                                |
| Cdif AP K66A W70A fw          | CTGCCTAAACAGTATATAGTTTTTCAGGCATATGATATTGCGAGGTATTGTAGTTTGTAAAGAA           |

## Supplementary Table 4: Degenerate primers for DMS

| Primer name              | Sequence (5'-3')                          |
|--------------------------|-------------------------------------------|
| Cdif_KYx1w_K77-NNK-fw2nd | TGGCGGTATTGTAGTTTATTNNKGACTIONATAAAGACGAC |
| Cdif_KYx1w_F76-NNK-fw2nd | ATTTGGCGGTATTGTAGTTTANNKAAAGACTATAAAGAC   |
| Cdif_KYx1w_L75-NNK-fw2nd | GATATTTGGCGGTATTGTAGTNNKTTAAAGACTATAAA    |
| Cdif_KYx1w_S74-NNK-fw2nd | TATGATATTTGGCGGTATTGTNNKTTATTAAAGACTAT    |
| Cdif_KYx1w_C73-NNK-fw2nd | AAATATGATATTTGGCGGTATNNKAGTTTATTAAAGAC    |
| Cdif_KYx1w_Y72-NNK-fw2nd | CAGAAATATGATATTTGGCGGNKGTAGTTTATTAAAA     |
| Cdif_KYx1w_R71-NNK-fw2nd | TTTCAGAAATATGATATTTGGNNKATTGTAGTTTATT     |
| Cdif_KYx1w_W70-NNK-fw2nd | GTTTTTCAGAAATATGATATTTNNKCGGTATTGTAGTTTA  |
| Cdif_KYx1w_I69-NNK-fw2nd | ATAGTTTTTCAGAAATATGATNNKTTGGCGGTATTGTAGT  |
| Cdif_KYx1w_D68-NNK-fw2nd | TATATAGTTTTTCAGAAATATNNKATTGGCGGTATTGT    |
| Cdif_KYx1w_Y67-NNK-fw2nd | CAGTATATAGTTTTTCAGAAANNKATATTTGGCGGTAT    |
| Cdif_KYx1w_K66-NNK-fw2nd | AAACAGTATAGTTTTTCAGNNKATGATATTTGGCGG      |
| Cdif_KYx1w_Q65-NNK-fw    | CCTAACAGTATATAGTTTTNNKAAATATGATATTTGG     |
| Cdif_KYx1w_F64-NNK-fw    | CTGCCTAACAGTATATAGTTNNKAGAAATATGATAT      |
| Cdif_KYx1w_V63-NNK-fw    | CGACTGCCTAACAGTATATANNKTTTCAGAAATATGAT    |
| Cdif_KYx1w_I62-NNK-fw    | GAACGACTGCCTAACAGTATNNKGTTTTTTCAGAAATAT   |
| Cdif_KYx1w_Y61-NNK-fw    | GAAGAAGACTGCCTAACAGNNKATAGTTTTTCAGAAA     |
| Cdif_KYx1w_Q60-NNK-fw    | TCTGAAGAAGACTGCCTAAANNKATATAGTTTTTCAG     |
| Cdif_KYx1w_K59-NNK-fw    | TATTTCTGAAGAAGACTGCCTNNKAGTATATAGTTTTT    |
| Cdif_KYx1w_P58-NNK-fw    | ACATATTTCTGAAGAAGACTGNNKAAACAGTATATAGTT   |
| Cdif_KYx1w_L57-NNK-fw    | ATTACATATTTCTGAAGAAGANNKCTAACAGTATATA     |
| Cdif_KYx1w_R56-NNK-fw    | AGAATTACATATTTCTGAAGAANNKCTGCCTAACAGTAT   |
| Cdif_KYx1w_E55-NNK-fw    | AATAGAATTACATATTTCTGAANNKCGACTGCCTAACAG   |
| Cdif_KYx1w_E54-NNK-fw    | GTAAATAGAATTACATATTTCTNNKGAACGACTGCCTAAA  |
| Cdif_KYx1w_S53-NNK-fw    | TTTTGTAATAGAATTACATATNNKGAAGAAGACTGCCT    |
| Cdif_KYx1w_Y52-NNK-fw    | ATATTTGTAAATAGAATTACANNKCTGAAGAAGACTG     |
| Cdif_KYx1w_T51-NNK-fw    | GACATATTTGTAAATAGAATTNNKATTTCTGAAGAAGCA   |
| Cdif_KYx1w_I50-NNK-fw    | AGAGACATATTTGTAAATAGANNKACATATTTCTGAAGAA  |
| Cdif_KYx1w_R49-NNK-fw    | ATAAGAGACATATTTGTAAATNNKATACATATTTCTGAA   |
| Cdif_KYx1w_N48-NNK-fw    | TTAATAAGAGACATATTTGTANNKAGAATTACATATTTCT  |
| Cdif_KYx1w_V47-NNK-fw    | GTTTTAATAAGAGACATATTTNNKAAATAGAATTACATAT  |
| Cdif_KYx1w_F46-NNK-fw    | TATGTTTTAATAAGAGACATANNKGTAAATAGAATTACA   |
| Cdif_KYx1w_I45-NNK-fw    | AAGTATGTTTTAATAAGAGACNNKTTTGTAAATAGAATT   |
| Cdif_KYx1w_D44-NNK-fw    | ATTAAGTATGTTTTAATAAGANNKATATTTGTAAATAGA   |
| Cdif_KYx1w_R43-NNK-fw    | AAAATTAAGTATGTTTTAATANNKAGACATATTTGTAAAT  |
| Cdif_KYx1w_V42-NNK-fw    | CATAAAATTAAGTATGTTTTANNKAGAGACATATTTGTA   |
| Cdif_KYx1w_L41-NNK-fw    | AATCATAAAATTAAGTATGTTNNKATAAGAGACATATTT   |
| Cdif_KYx1w_V40-NNK-fw    | TTAAATCATAAAATTAAGTATNNKTTAAATAGAGACATA   |
| Cdif_KYx1w_Y39-NNK-fw    | CTCTTAAATCATAAAATTAAGNNKGTTTTTAATAAGAGAC  |
| Cdif_KYx1w_K38-NNK-fw    | GACCTCTTAAATCATAAAATNNKATGTTTTAATAAGA     |
| Cdif_KYx1w_L75-rv2nd     | TAAACTACAATACCGCCAAATATCATA               |
| Cdif_KYx1w_C73-rv2nd     | ACAATACCGCCAAATATCATAATTTCTG              |
| Cdif_KYx1w_R71-rv2nd     | CCGCCAAATATCATAATTTCTGAAAAAC              |
| Cdif_KYx1w_I69-rv        | AATATCATAATTTCTGAAAAACTATATA              |
| Cdif_KYx1w_Y67-rv        | TTTCTGAAAAACTATATACTGTTTAGG               |
| Cdif_KYx1w_Q65-rv        | CTGAAAAACTATATACTGTTTAGGCAG               |
| Cdif_KYx1w_V63-rv        | TATATACTGTTTAGGCAGTCGTTCTTC               |
| Cdif_KYx1w_Y61-rv        | CTGTTTAGGCAGTCGTTCTTCAGAATA               |
| Cdif_KYx1w_K59-rv        | AGGCAGTCGTTCTTCAGAATATGTAAT               |
| Cdif_KYx1w_L57-rv        | TCGTTCTTCAGAATATGTAATTTCTATT              |
| Cdif_KYx1w_E55-rv        | TTCAGAATATGTAATTTCTATTACAAA               |
| Cdif_KYx1w_S53-rv        | ATATGTAATTTCTATTACAAATATGTC               |
| Cdif_KYx1w_T51-rv        | AATTTCTATTACAAATATGTTCTTTAT               |
| Cdif_KYx1w_R49-rv        | ATTTACAAATATGTTCTTTATTAAC                 |
| Cdif_KYx1w_V47-rv        | AAATATGTTCTTTATTAACATACTT                 |
| Cdif_KYx1w_I45-rv        | GTTCTTTATTAACATACTTTAATTTATG              |
| Cdif_KYx1w_R43-rv        | TCTTTATTAACATACTTTAATTTATG                |
| Cdif_KYx1w_L41-rv        | AACATACTTAATTTATGATTTAAGAG                |
| Cdif_KYx1w_Y39-rv        | CTTAATTTATGATTTAAGAGGTTCTTT               |
| Cdif_KYx1w_I37-rv        | AATTTATGATTTAAGAGGTTCTTTTT                |

**Supplementary Table 5: Primers used for preparation of NGS library**

| Primer name                   | Sequence(5'-3')                                                                                          |
|-------------------------------|----------------------------------------------------------------------------------------------------------|
| P5-UDI0001-Rd1-TAG-gfp215-fw  | AATGATACGGCGACCACCGAGATCTACACAGCGCTAGACACTCTTCCCTACACGACGCTC<br>TTCCGATCTNNNNNNTAGAGAGACCACATGGTCCTTCTT  |
| P7-UDI0001-Rd2-ACC-FLAG2-8-rv | CAAGCAGAAGACGGCATAACGAGATAACCGCGGGTGACTGGAGTTCAGACGTGTGCTCTTC<br>CGATCTNNNNNNACCTTTGTCGTCGTCGTCCTTTATA   |
| P7-UDI0001-Rd2-AGC-FLAG2-8-rv | CAAGCAGAAGACGGCATAACGAGATAACCGCGGGTGACTGGAGTTCAGACGTGTGCTCTTC<br>CGATCTNNNNNNAGCTTTGTCGTCGTCGTCCTTTATA   |
| P7-UDI0001-Rd2-AGG-FLAG2-8-rv | CAAGCAGAAGACGGCATAACGAGATAACCGCGGGTGACTGGAGTTCAGACGTGTGCTCTTC<br>CGATCTNNNNNNAGGTTTGTGTCGTCGTCGTCCTTTATA |
| P7-UDI0001-Rd2-CTC-FLAG2-8-rv | CAAGCAGAAGACGGCATAACGAGATAACCGCGGGTGACTGGAGTTCAGACGTGTGCTCTTC<br>CGATCTNNNNNNCTCTTTGTGTCGTCGTCGTCCTTTATA |
| P7-UDI0001-Rd2-CTG-FLAG2-8-rv | CAAGCAGAAGACGGCATAACGAGATAACCGCGGGTGACTGGAGTTCAGACGTGTGCTCTTC<br>CGATCTNNNNNNCTGTTTGTGTCGTCGTCGTCCTTTATA |
| P7-UDI0001-Rd2-TGC-FLAG2-8-rv | CAAGCAGAAGACGGCATAACGAGATAACCGCGGGTGACTGGAGTTCAGACGTGTGCTCTTC<br>CGATCTNNNNNNTGCTTTGTGTCGTCGTCGTCCTTTATA |
| P7-UDI0001-Rd2-TTA-FLAG2-8-rv | CAAGCAGAAGACGGCATAACGAGATAACCGCGGGTGACTGGAGTTCAGACGTGTGCTCTTC<br>CGATCTNNNNNNTTATTTGTGTCGTCGTCGTCCTTTATA |
| P7-UDI0001-Rd2-TTG-FLAG2-8-rv | CAAGCAGAAGACGGCATAACGAGATAACCGCGGGTGACTGGAGTTCAGACGTGTGCTCTTC<br>CGATCTNNNNNNTTGTTTGTGTCGTCGTCGTCCTTTATA |

**Supplementary Table 6: MD simulation checklist.**

| <b>Reliability and reproducibility checklist for molecular dynamics simulations</b><br><b>*All boxes must be marked YES by acceptance unless an N/A option is available</b>                                                                                                                                                            | <b>Yes</b>                          | <b>N/A</b>               | <b>Response</b><br><b>(Please state where this information can be found in the text)</b>                                        |
|----------------------------------------------------------------------------------------------------------------------------------------------------------------------------------------------------------------------------------------------------------------------------------------------------------------------------------------|-------------------------------------|--------------------------|---------------------------------------------------------------------------------------------------------------------------------|
| <b>1. Convergence of simulations and analysis</b>                                                                                                                                                                                                                                                                                      |                                     |                          |                                                                                                                                 |
| 1a. Is an evaluation presented in the text to show that the property being measured has equilibrated in the simulations ( <i>e.g.</i> time-course analysis)?                                                                                                                                                                           | <input checked="" type="checkbox"/> |                          | See ED Fig. 7b                                                                                                                  |
| 1b. Then, is it described in the text how simulations are split into equilibration and production runs and how much data were analyzed from production runs?                                                                                                                                                                           | <input checked="" type="checkbox"/> |                          | See Methods: MD simulation Set-up                                                                                               |
| 1c. Are there at least 3 simulations per simulation condition with statistical analysis?                                                                                                                                                                                                                                               | <input checked="" type="checkbox"/> |                          | 10 replica simulations per condition each. See Methods: MD simulation setup.                                                    |
| 1d. Is evidence provided in the text that the simulation results presented are independent of initial configuration?                                                                                                                                                                                                                   | <input checked="" type="checkbox"/> |                          | Evidence is provided in Figure 8a, showing that a wide conformational space around the cryo-EM model is explored by CliM NC.    |
| <b>2. Connection to experiments</b>                                                                                                                                                                                                                                                                                                    |                                     |                          |                                                                                                                                 |
| 2a. Are calculations provided that can connect to experiments ( <i>e.g.</i> loss or gain in function from mutagenesis, binding assays, NMR chemical shifts, J-couplings, SAXS curves, interaction distances or FRET distances, structure factors, diffusion coefficients, bulk modulus and other mechanical properties, <i>etc.</i> )? | <input checked="" type="checkbox"/> |                          | Mutagenesis experiments of stalling critical residue L75 (Fig. 7) were complemented and compared with MD simulations (Fig. 8a). |
| <b>3. Method choice</b>                                                                                                                                                                                                                                                                                                                |                                     |                          |                                                                                                                                 |
| 3a. Is it described in the text what force field and water model are used and why?                                                                                                                                                                                                                                                     | <input checked="" type="checkbox"/> |                          | See Methods: MD simulation Set-up                                                                                               |
| 3b. Do simulations contain membranes, membrane proteins, intrinsically disordered proteins, glycans, nucleic acids, polymers, or cryptic ligand binding?                                                                                                                                                                               | <input checked="" type="checkbox"/> | <input type="checkbox"/> | Nucleic acids                                                                                                                   |

|                                    |                                                                                                                                                                                                                       |                                     |                                     |                                                                                               |
|------------------------------------|-----------------------------------------------------------------------------------------------------------------------------------------------------------------------------------------------------------------------|-------------------------------------|-------------------------------------|-----------------------------------------------------------------------------------------------|
|                                    | If 3b is <b>YES</b> , are enhanced sampling methods used?                                                                                                                                                             | <input type="checkbox"/>            | <input checked="" type="checkbox"/> | Response not needed if <b>N/A</b>                                                             |
|                                    | If enhanced sampling methods are used, are the convergence criteria clearly stated?                                                                                                                                   | <input type="checkbox"/>            |                                     |                                                                                               |
|                                    | If 3b is <b>YES</b> , is it explained in the text why or why not enhanced sampling methods are used?                                                                                                                  | <input type="checkbox"/>            |                                     |                                                                                               |
| <b>4. Code and reproducibility</b> |                                                                                                                                                                                                                       |                                     |                                     |                                                                                               |
|                                    | 4a. Is a table provided describing the system setup, such as simulation box dimensions, total number of atoms, total number of water molecules, salt concentration, lipid composition (number of molecules and type)? | <input checked="" type="checkbox"/> |                                     | See Methods: MD simulation setup.                                                             |
|                                    | 4b. Is it described in the text what simulation and analysis software and which versions are used?                                                                                                                    | <input checked="" type="checkbox"/> |                                     | See Methods: MD simulation setup.                                                             |
|                                    | 4c. Are initial coordinate and simulation input files and a coordinate file of the final output provided as supplementary files or in a public repository?                                                            | <input checked="" type="checkbox"/> |                                     | <a href="https://doi.org/10.5281/zenodo.17779011">https://doi.org/10.5281/zenodo.17779011</a> |
|                                    | 4d. Is there custom code or custom force field parameters?                                                                                                                                                            | <input type="checkbox"/>            | <input checked="" type="checkbox"/> | Response not needed if <b>N/A</b>                                                             |
|                                    | If <b>YES</b> , are they provided as supplementary profiles or in a public repository?                                                                                                                                | <input type="checkbox"/>            |                                     |                                                                                               |

## Supplementary References

1. Syroegin, E. A., Aleksandrova, E. V & Polikanov, Y. S. Insights into the ribosome function from the structures of non-arrested ribosome-nascent chain complexes. *Nat. Chem.* 15, 143–153 (2023).
2. Gersteuer, F. *et al.* The SecM arrest peptide traps a pre-peptide bond formation state of the ribosome. *Nat. Commun.* 15, 2431 (2024).
3. Su, T. *et al.* The force-sensing peptide VemP employs extreme compaction and secondary structure formation to induce ribosomal stalling. *Elife* 6, (2017).
4. van der Stel, A.-X. *et al.* Structural basis for the tryptophan sensitivity of TnaC-mediated ribosome stalling. *Nat. Commun.* 12, 5340 (2021).
5. Matheisl, S., Berninghausen, O., Becker, T. & Beckmann, R. Structure of a human translation termination complex. *Nucleic Acids Res.* 43, 8615–26 (2015).
6. Aleksandrova, E. V *et al.* Mechanism of release factor-mediated peptidyl-tRNA hydrolysis on the ribosome. *Science* 388, eads9030 (2025).
7. Beckert, B. *et al.* Structural and mechanistic basis for translation inhibition by macrolide and ketolide antibiotics. *Nat. Commun.* 12, 4466 (2021).
