# Supplementary material
Source: Springer Nature journal article supplement (https://prod.mbexc.uni-goettingen.de/archive/1/733/7544a8ec8c8c9937/download)
Supplement: MOESM2 [file 41467_2026_72673_MOESM2_ESM.pdf › 41467_2026_72673_MOESM2_ESM.pdf]

## Description of Additional Supplementary Files

**File name: Supplementary Movie 1**

**Description:** Cryo-EM map of ClIM-SRC stalling at the stop codon of ClIM, including a section that reveals the quality of the density (transparent surface) for the nascent chain (blue), P-tRNA (purple) and the release factor (RF, green) together with the molecular model. The final part of the video shows an overlay of an active RF (PDB ID 9MTP<sup>28</sup>) against the RF from the ClIM-SRC, which illustrates an overlap of Q230 of the active RF with the penultimate residue from ClIM. This clash results in a displaced GGQ loop of the RF in ClIM.
